# Supplementary material for: Highly synergistic combinations of nanobodies that target SARS-CoV-2 and are resistant to escape
Source: eLife. 2021 Dec 15;10:e73027. doi: 10.7554/eLife.73027 (PMC8651292; doi:10.7554/eLife.73027)
Supplement: Figure 1—source data 1. [file elife-73027-fig1-data1.xlsx]

## Sheet: Sheet1
ID	Epitope	Sequence
S1-1	RBD	MAQVQLVESGGGLVQAGGSLRLSCAASGMPFSSYAMGWFRQAPGKEREFVAAVNWNGISTYLADSVKGRFTASRDNAKNTAYLQMNSLKPEDTAVYYCAADSKGWSEWGMDYWGKGTLVTVS
S1-2	non-RBD	MAQTQLEESGGGLVQAGGSLRLSCAASGSIIRPNVMAWYRQGPGKQRELVASIHSSGTKNYADSVKGRFTISRDNAKNTVYLQMNSLKPEDTAVYYCATRSTWATQPDYWGQGTQVTVS
S1-3	non-RBD	MGQVQLVESGGGLVQAGGSLRLSCAASGSTFSNTGLGWYRQAPGKQREWVASISPSGSTSYLDSVRGRFIFSRDNAKNIAYLQMNSLKPEDTAVYYCNTLPRSGSWGQGTQVTVS
S1-4	RBD	MAQVQLVESGGGLVQAGGSLRLSCAAAGRTFSSYFMAWFRQAPGKEREFVAAVDWSGGDTLYTDSVKGRFTISRDNGANTVYLQMNNLKREDTAVYYCAADRGYSLYYYQAREYEYWGQGTQVTVS
S1-5	RBD	MAQVQLVESGGGLVQPGGSLRLSCAASGFTLGYYAIGWFRQAPGKEREGVSCIGSSDGSTYYADSVKGRFTISRDNAKNTVYLQINSLKPEDTAVYYCATKGPPQGVLRCSISGRYDFWGQGTQVTVS
S1-6	RBD	MAQVQLVESGGGLVQAGDSLRLSCVVSGRTSSFFSMAWFRQAPGKEREFVAVIRGSGGVTFYSESVKGRFTISRDNAKNTVSLQMSSLKPEDTAVYYCAGSDFGDHGPLSGRTDFSSWGQGTQVTVS
S1-7	non-RBD	MAQVQLAESGGGLVQVGDSLRLSCAASGRTYTSSMYGMAWFRQAPGKEREFVAVIGWNTYYADPVKGRFTISRDNAKNIVYLQMNNLKPEDTAVYYCASRKAAGLASGYPSPSYYDYWGQGTQVTVS
S1-9	non-RBD	MAQVRLVESGGGLVQPGGSLRLSCVVSGVSGSAFRFNRLGWYRQAPGKERELVASISSGGSTNYADSVKGRFTISRDNAKSTVSLQMNSLKPEDTAVYYCNIRADFFSSTRTGDWGQGTQVTVS
S1-10	non-RBD	MAQVQLVESGGGLVQAGGSLRLSCAASGRTFSSAGMAWFRQAPGKEREFVATSNWNGGDTDYADSVKGRFTISRDNAKNTVYLQMNNLKPEDTAVYYCAAHLQKYGGDYYARIWGQGTQVTVS
S1-11	non-RBD	MAEVQLVESGGGLVQFGGSLRLSCAASGFTLSPYDIGWFRQAPGKEREGVSCISVTGGTTDYTDSVKGRFTISRDHARNTVYLQMNNLKPEDTAVYYCAAHTASFCRGDYSASVARYWGQGTQVTVS
S1-12	RBD	MAQVQLVESGGGLVQAGGSLRLSCAASGRTFSNYAMGWFRQAPGKEREFVVAISWKSGLITAANFLEGRFTISRDNAKNTMYLQMNNLKPEDAAVYYCAVDPNNRRGTLTSYYDHWGQGTQVTVS
S1-14	RBD	MAQVQLVESGGGLVQAGGSLRLSCAASGSTFSRLSMGWYRQVPGKQRELVARILPLGGPYYRDFVQGRFTISRDNVKNMLYLQMNSLKPEDTAVYYCNRAPFGTAWDGPDNYDYWGQGTQVTVS
S1-17	non-RBD	MAQVQLVESGGGLVQAGGSLRLSCPASGLASTYSAKGWFRQAPGKEREFVAAINRSGGITSYADSVKGRFTISRDDAKNTVYLQMNNLKPEDTAVYYCAAKVTLSDDTYNQPGNYPSWGQGTQVTVS
S1-19	RBD	MAQVQLVESGGGLVRAGGSLRLSCAASVSTFSSYAMGWYRQAPGNQRELVAGISPDGSTNYADSVKGRFTISRDNAKNTLVLQMNSLKSEDTAVYYCRIFLPEIPGRGSWGQGTQVTVS
S1-20	RBD	MAQVQLVESGGGLVQPGGSLRLSCAVSGFPLDFYAIGWFRQASGKEREWVSCISRRDDYTSYVDSVKGRFTISRDNAENTVYLQMNSLKLEDTAVYYCAGVRTSSGTVCQAYPRWYDTWGQGTQVTVS
S1-21	RBD	MAQVQLVESGGGLVQAGGSLRLSCAVSGIAVRASTMGWYRQAPGKQRELVATINIGGSTNYADSVKGRFTIARDNAENTAYLQMNSLKPEDTAVYYCKAQYYTGYDYWGRGTQVTVS
S1-23	RBD	MAQVQLVESGGGLVQAGGSLRLSCVASGRTSRPYRMGWFRQAPGKEREFVAAIFWSGSHTLYEDSVKGRFTISTDNAQNTVYLQMNSLKPEDTAVYYCAARNQATGNYDVWGQGTQVTVS
S1-24	non-RBD	MAQVQPVESGGGLVQAGGSLRLSCVASGSTTTNYHMGWYRQTPGEQRELVAAINAGGITNYADSVKGRFTISRDNAKNTMYLQMNNLRFEDTAVYYCNIGGGWDYRNSYYIPRVDSWGQGTQVTVS
S1-25	non-RBD	MAQVRLVESGGGLVQPGGSLRLSCVVSGVSGSGFRFNRLGWYRQAPGKERELVASISSGGSTNYADSVKGRFTISRDNAKNSVSLQMNSLKPEDTAVYYCNIRADFFTSTRTGDWGQGTQVTVS
S1-27	RBD	MAQVQLVESGGGLAQPGGSLRLSCAASAGTFGSSRMGWFRQAPGKEREFVAAIMPSGSHTNYADSVKGRFTISRDNAKDTIYLQMNSLKPEDTAVYYCGARDPSSYTYDRWGQGTQVTVS
S1-28	RBD	MAQVQLVESGGGLVQAGGSLKLSCAVSGRTLSSYVMGWFRQAPGKEREFVAAIRWNGGSTFYADSVQGRLTISRDNAKNMVYLQMDSLKPEDTAAYYCAASPRTMYYASYYYTRTSYDYWGQGTQVTVS
S1-29	RBD	MAQVQLVESGGGQAQAGDSLRLSCAASGDTFSSAPMGWFRQAPGKERELIAGISWSALNTYYADSVKGRFTISREDAKNTVYLQMNSLKQEDTAVYHCAARTRSHFYSEVYRRASDYDFWGQGTQVTVS
S1-30	non-RBD	MAQVPLVESGGGLVQAGGSLRLSCTTSGSTFSTSHMGWYRQAPGKQRELVASISTEGTTEYADFVKGRFTISRNNAQNTVYLEMASLKPEDTAVYHCNRGGWRYYGDGSHYIPDFRFWGQGTQVTVS
S1-31	RBD	MAQVQLVESGGGLVQPGGSLRLSCAASGSISSIIYRGWFRQVPGKEGEFVASIDTAGSTTYADSVKGRFTISRDNAKNTLYLQMNSLKPEDTAVYYCKYVTWAPRVEYRGQGTQVTVS
S1-32	non-RBD	MAQVQLVESGGGLVQAGGSLRLSCTASGVAFSLYHMAWFRQAPGKEREFVTAINWNGGIADYVDSVKGRFTISRDNAKNTVYLQMNSLKPEDTAVYYCAAKLGAYYTTYRKANEYQYWGQGTQVTVS
S1-35	RBD	MAQVHLIESGGGLVQAGGSLRLSCVASGRTFSSLVMAWFRQAPGKEREFVAFIEWSGAETYYTDSVKGRFTISRDNAKNTVILQMNSVKPEDTGVYYCAADKGYSLYYYRESDYEYWGQGTRVTVS
S1-36	RBD	MAQVQLVESGGGLVQAGGSLRVSCAASERILSSYVMGWFRQAPGKEREFVAAIRWNGGSTFYADSVKGRLTISRDNAKNTVYLQMNSLKPEDTAVYYCAASPRTMYLASYYYHRTSYDYWGQGTQVTVS
S1-37	RBD	MAQVQLVESGGGLVQPGGSLRLSCVVSGFPLDFFAIGWFRQASGKEREWVSCISRRDDYTSYVDSVNGRFTISRDNAENTVYLQMNSLKLEDTAVYYCAGVRTSSDTVCQNYPRWYLTWGQGTQVTVS
S1-38	RBD	MAQVQLVESGGGLVQAGGSLRLSCAASGRTFSYAIMGWFRQAPGKDREFVGWMAWSGPAKYYADSVKGRFSISRDNAKNTVYLQMNSLKPEDTAVYYCAASKEITTMTTRYDYWGQGTQVTVS
S1-39	RBD	MAQVQLVESGGGLVQAGGSLRLSCAASGRTFGSYAMGWFRQAPGKERECVSAINWSGDHTYYADSVKGRFTISRDNAKNTVYLQMNSLKPEDTAVYYCAARGPNEWGLPREDLFYDYWGQGTQVTVS
S1-41	non-RBD	MAQVPLVESGGGLVQAGGSLRLSCTTSGSTFSTYHMGWYRQAPGKQRELVAAINSEGSTYYPDSVKGRFTISRDNAQNTVYLEMASLKPEDTAVYHCNRGGWRYYGDGSRYIPDFRSWGQGTQVTVS
S1-46	RBD	MAQVQLVESGGGLVQAGGSLRVSCVISGHQFSDYVIGWFRQAPGKEREFVGAIWWSDDITYYEDSVKGRFTVSRDNAKNTVYLQMNSLKPEDTAVYHCAVRFRPVSTYQVRSTDDYGYWGQGTQVTVS
S1-48	RBD	MAQVQLVESGGGLVQPGGSLRLSCAASGITLDYYAIGWFRQAPGKEREGVSLISSSDGSTYYADSVKGRFTISRDNAKNTVYLQMNSLKPEDTAVYYCATGSLTRYGSSWHVPFGSRSYENWGQGTQVTVS
S1-49	non-RBD	MAQIQMQLVESGGGLVQAGGSLRLSCTASGSIFSIGAMSWYRQAPGKQRELVAQISSGGITNYADSVKGRFTISRDNAKNTVYLQMNTLKPEDTAVYYCAADETTPWGATRGWGQGTQVTVS
S1-50	non-RBD	MAQTQLEESGGGLVQAGGSLRLSCAASGSIIRPNVMAWYRQGPGKQRELVASMHSSGTKNYAESVKGRFTISRDNAKNTVYLQMNSLKPEDTAVYYCATRSTWAGQPDYWGQGTQVTVS
S1-51	RBD	MAQVQLVESGGGLVQAGGSLRLSCAASGFSFSNYYMVWFRQAPGKEREFVAAITTWLSNTYYTDSVKDRFTISRDNAKKMLYLQMNSLKPEDTALYYCAAEQSGRDWRRTSPSPYAYWGQGTQVTVS
S1-52	RBD	MAQVQLVESGGGLVQAGGSLRLSCAASGSIFSLNAKAWYRQAPGSQRELVARITGSGTITNYADSVKGRFTISRDNVKNTVTLQMNSLRPEDTAIYICAAAPGGLWTGPAYWGQGTQVTVS
S1-53	RBD	MAQVQLVESGGGLVQAGDSLRLSCAASGYTITNYWMAWFRQAPGKERESVATITYGAGMKYYADSVKGRFTISRDNTKNTVYLQMESLKPEDTAVYYCRSPQRPYSGFGSDDYWGQGTQVTVS
S1-54	RBD	MAQVQLVESGGGLVQAGGSLRLSCAASGIIFSKYAVAWYRQAPGKQRELVATINHSGDTKYADSVKGRFTISRDNAKSTLYLQMNSLKPEDTAVYYCNIGIWIASAHSPDGRADHWGRGTQVTVS
S1-55	RBD	MAQVQVVESGGGLVQAGGSLRLSCAVSGRTFGMRAMGWFRQAPGKEREFVAVISTSGGDTSYADSVKGRFTISRDNAKNTVYLQMNTLKPEDTAVYYCAVPRIGAWSRSPRDYDIWGQGTQVTVS
S1-56	RBD	MAQVQLVESGGGLVQPGGSLRLSCAASGSIFSIDAMGWFRQAPGKEREPVAHIRNTGTTAYADSVKGRFTISRDNTKNTVYLQMNSLKPEDTAVYYCNELKDFLGGVIPLNSWGQGTQVTVS
S1-58	non-RBD	MAQVQLVESGGGLVQAGGSLRLSCAASGSTFSAYSMGWYRQAPGKQRELVAAISSGGSTNYADSVKGRFTISRDNAKNTVYLQMNSLKPEDTAVYYCNTVGWDYRYDYPITGRNDYWGQGTQVTVS
S1-60	non-RBD	MAQVQLVESGGGLVQAGGSLRLSCAASGSTFSTNAMGWYRQAPGKERELVAEITTDGTTRYADSVKGRFTISRDNAKNTVYLQMNSLKSEDTAVYYCNTVTRFLGGLLRPDYWGQGTQVTVS
S1-61	RBD	MAQVQLIESGGGLVQAGGSLRLSCAASGRTFSSYAMGWLRQAPGEEREFVAAISRRGMDTYYADSVKGRFTISRDNAKNTVYLQMNSLKPEDTAVYYCARKMVAPIFVVVTTRDEYDYWGQGTQVTVS
S1-62	RBD	MAQVQLVESGGGLVQAGGSLRLSCAPSGRTSNTYPMAWFRQAPGKEREFVAAITRSVPNTYYADSVKGRFTISRDIAKNTMYLQMNSLKPEDTAVYYCAGSSNVYLLTRDEYDYWGQGTQVTVS
S1-63	RBD	MAQVQLVESGGGLVQFGGSLRLSCAASGIIFSINAMGWYRQAPGKERESVALIMNNGNTYYENSVKGRFSISRDNAKNTVYLQMDSLKPEDTAVYYCNAVAYRDYDRKRYDYWGQGTQVTVS
S1-64	non-RBD	MAQVQLVESGGGLVQPGGSLRLSCAASGSIFSVNSMGWYRQAPGKERELVATITSHGITNYADSVKGRFTISRDNAKDTVYLQMNSLKPEDTAVYFCHREDTGLWNSKDTYWGQGTQVTVS
S1-65	non-RBD	MAQVQLVESGGGLVQPGGSLRLSCAASGSIFNVNSMGWYRQAPGKERELVATITTRGITNYADSVKGRFTISRGNAKDTVHLQMNSLKPEDTAVYYCNREDTGLWNSKDVYWGQGTQVTVS
S1-66	non-RBD	MAHVQLVESGGGLVQAGGSLRLSCVASTRTFMGWFRQAPGKERAFVAAISWNGVSITYADSVAGRFTISRDNAKNTVLLQMNSLKPEDTAVYYCAAADVVAGTRWTDYNYWGQGTQVTVS
S1-RBD-3	RBD	MAEVQLVESGGGLVQAGGSLRLSCAASGFTLDTTAIGWFRQAPGKEREGVSCISTSGERTYYADSVKGRFTISRDNAKNMVYLQMNNLKPEDTAVYSCAAKYASFQYLPVGLPWSMYDVRGQGTQVTVS
S1-RBD-4	RBD	MAEVQLVESGGGLVQAGGSLRLSCAASEFTLGYYAIGWFRQAPGKEREGVSFISRHGSTTYYTKSVRGRFTISRDNSENTVYLQMDGLKPEDTAVYYCAASKTTAWDTIRVSAIEYDYWGQGTQVTVS
S1-RBD-5	RBD	MAQVQLVESGGGLVQAGGSLRLSCAASGRTFSSLVMGWFRQAPGKEREFVAFIEWNGGDTYYTDAVKGRFTISRDNAKNTVFLQMNSLKPEDTAVYYCAADRAYSLYYYRVSEYQYWGQGTRVTVS
S1-RBD-6	RBD	MGQVQVAESGGGLVQAGDSLRLSCAASGRTFTTNAMGWFRQAPGKEREFVAAISWSTGTTYYSDPVKGRFTISRDNAKNTVYLQMNSLKPGDTAVYYCTLRSAFNAYAWTTERAYDYWGQGTQVTVS
S1-RBD-9	RBD	MAQVQLVESGGGSVQAGGSLRLSCAASARTFSNYVVAWFRQAPGKEREFVALITWSGADRYYGDSVKGRFTISRDDAKNTVYLQMNSLKPEDTADYYCAADRGSSYHYAESKNYDYWGQGTQVTVS
S1-RBD-10	RBD	MAQVQLVESGGGLVQAGGSLRLSCAVSGRTFRNYAMGWFRQAPGKEREFVAVITATDDITYYADSVKGRFTISRDNAKNTVYLQMNSLKPEDTAVYYCAADYGDSYYYTRRTEYGYWGQGTQVTVS
S1-RBD-11	RBD	MAQVQVVESGGGLVQAGGSLRLSCVASGSTDSNYVMGWYRQTAGKQREWVASINSGGETRSVDSVKGRFTISGDNAKNTVYLQMNSLKPEDTAVYYCFYERLAWDPSTSWGQGTQVTVS
S1-RBD-12	RBD	MAQVQLVESGGGLVQPGGSLRLSCAASGSILSINDMGWYRQAPGKERELVAFITSGGSTNYAESVKGRFTVSRDNAKHAVYLQMNSLKPEDTAVYYCNADIRESGFVYGMNAWGKYWGKGTLVTVS
S1-RBD-14	RBD	MAQVQLVESGGGLVQAGGSVRLSCAASGRSFSINPMGWFRQAPGKEREFVAAISWSGSKTVYVDSVKGRFSISRDNAKNTVYLQMNSLEPEDTAVYHCAVASRGPVYGANYVPGPHEYEYWGQGTQVTVS
S1-RBD-15	RBD	MAQVQLVESGGGLVQAGGSLRLSCAASGRTFSSYAMGWFRQAPGKEREFVASINWNGGNTYYADFVKGRFTISRDNAKNTVYLQMNSLKPEDTAVYYCAATGPNEYGLPREDLFYDYWGQGTQVTVS
S1-RBD-16	RBD	MAQVQLVESGGGLVQSGGSLRLSCVASGRGFDRYPMGWFRQAPGKEREFVGGINWNGANTYYADSVKGRFTISRDNTKNTVYLQMNSLKPEDTALYYCAADQHYMGSPPPKEYEYDYWGQGTQVTVS
S1-RBD-18	RBD	MAQVQLVESGGGLVQAGGSLRLSCTASGITFSGYVMAWYRQAPGKQRELVGWISHGGIKDYADSVKGRFTISRDNPKNTVYLQMNSLKPEDTAVYYCNRKDAQSSWGQGTQVTVS
S1-RBD-19	RBD	MAEVQLVESGGGLVQPGGSLRLSCVASGFSFSSYGMGWFRQAPGKEREFVATISGTGGNTAYSDSVKDRFTISRDNAKNTVYLEMNSLKPEDTAVYYCAAPPSWYTRRYINFAPSEVRHWGQGTQVTVS
S1-RBD-20	RBD	MAQVQLVESGGGLVQAGDSRRLSCAVSGRTFSSGAMAWFRQAPGEERDFVAVIRWSGSTYYADSVKDRFTISTDNVKNTVFLQMNNLAPEDTAVYYCAATDRTHYDIVEYTRDHFYSNWGQGTQVTVS
S1-RBD-21	RBD	MAQVQLVESGGGSVQAGGSLRLSCAASGRAFSDYGMGWFRQAPGKEREFVATIDSTGSNTYYADSVKGRFTISRVNAENTVYLQMNSLKPEDTAVYYCAADRFGGGRMEYRYEYWGQGTQVTVS
S1-RBD-22	RBD	MAQVQLAESGGGLVQAGDSLRLSCVASGRTFSAYTLAWFRLAPGKEREFVAHIDWSGTETNYADSNKGRFTISRDNALNTVYLQMTGLKPEDTAVYYCAADRAYSLMYYDTREYEYWGQGTQVTVS
S1-RBD-23	RBD	MAQVHLVESGGDLVQPGGSLRLSCVASGSGFENNAITWYRQAPGKERELVSGITSGGSTNYADSVKGRFTISRDNAKNTVYLEMNSLKPEDTAVYLCQAVAWDSRRRSVVAFWGQGTQVTVS
S1-RBD-24	RBD	MAQVQLVESGGGLVQAGGSLRLSCVVSGHTFGSLTMAWFRQAPGKEREFVAGTDWSGINYADSVKGRFTISRDSTTNTLFLQMNSLKPEDTAVYYCAFDRAASLYPLRDQADYMYWGQGTQVTVS
S1-RBD-25	RBD	MAEVQLVESGGGLVQPGGSLKLSCAASGFTLDYYTIGWFRQAPGKEREGVSYISSSGSNTYYEDSVKGRFTISRDNAKSTVYLQMNSLKPEDTAVYYCAARRVWQETIVVRGPEHYEYWGQGTQVTVS
S1-RBD-26	RBD	MAQVQLVESGGGLVQPGGSLRLSCAISGRTFGGYGVGWFRQAPGKEREFVAGITSTSFGTSYADAVKGRFTISRDNAKNTVTLQMNSLKFEDTAVYYCAASVLSPPPRTNSAYAYWGQGIQVTVS
S1-RBD-27	RBD	MAQVHVVESGGGLVQAGGSLRLSCAASGRTFGIYNMGWFRQAPGKEREFVAAITGDASDTYYADSVKGRFTISRQNAKNTVFLQMDNLKPEDTAVYYCAATGAITRATMWKPNFWGQGTQVTVS
S1-RBD-28	RBD	MAQVQLAESGGGLVQAGGSLRLSCAASGRTISTDAMGWFRQAPGKEREFVAISWRSDDTYYADNVKGRFTMSRDNAKNTVYLQMNNLKPEDTAVYYCVADQGRSYYYTRESEYNYWGQGTQVTVS
S1-RBD-29	RBD	MAQVQLVESGGGLVQDGGSLRLSCAASGLASIVFNMGWFRQAPGKEREFVAGILGSGQSTYYGNSVKGRFTISRDSAKNTVYLQMNSLKPEDTAVYYCAAGGRLDLVNTTGGYEPTYWGQGTQVTVS
S1-RBD-30	RBD	MAQVQLVESGGGLVQAGGSLRLSCAASGRTFSSLVMGWFRQAPGKEREFVAFIEWSGAETYYTDSVKGRFTISRDNAKNTVFLQMNSLKPEDTAVYYCAADAAYSLYYYRVSEYEYWGQGTRVTVS
S1-RBD-32	RBD	MAEVQLVESGGGLVQPGGSLKLSCAASGFTLDYYTIGWFRQAPGKEREGVSYISSSGSNSYYVDSVKGRFTISRDNAKSTVYLQMNSLKPEDTAVYYCAARRVWQPTIVVSGPEHYDYWGQGTQVTVS
S1-RBD-34	RBD	MAQVQLVESGGGLVQAGDSLRLSCVASGRTFSTTFMGWFRQAPGKERDFVAAINWNGGSTRYADSVKGRFTISRDNAKNMVYLQLNSLKPEDTAVYYCAADPSDGRVVGYNYVPVSTHEYDYWGQGTQVTVS
S1-RBD-35	RBD	MTQVQVVESGGGLVQAGGSLRLSCVASGSTDSNYVMGWYRQASGKQREWVASINSGGDTKSVDSVKGRFTISIDNAKNTMYLQMNSLKPEDTAVYYCFYEKLAWDPSTTWGQGTQVTVS
S1-RBD-36	RBD	MAQVQLVESGGGLVQAGDSLRLSCVASGRTFSTTFMGWFRQAPGKEREFVAAINWSGGSTRYADSVKGRFTISRDNAKNTVYLQLNSLKPEDTAVYYCAADPSDGRVFGVNYVPVSTHEYDYWGQGTQVTVS
S1-RBD-37	RBD	MAQVQLVESGGGLVQAGGSLRLSCGASGDSFSFRWYGMNWYRQGPGKPREWVAGISSAGSTNYADSVKGRFTISRDNAKNTVYLQMNSLKPEDTAVYYCYSATQERDYWGQGTQVTVS
S1-RBD-38	RBD	MAQVQLVESGGGLVQAGGSLRLSCAASGSTFDNYPVTWYRQAPGKQREFVASIRSGHITNYANSVKGRFTMSKDNAKNTVYLEMNNLKPEDTAVYYCYTVDAQSDYWGQGTQVTVS
S1-RBD-39	RBD	MAQVQLVESGGGRVQAGGSLRLSCAVSGSTFSSDVMAWYRQPPGKQREWVASFSSSGSGNYAASVKGRFTISRENAKNTVYLQMNSLKPEDTGVYYCHAAHVNGGDSWGQGTQVTVS
S1-RBD-40	RBD	MAQVQLVESGGGLVQAGGSLRLSCAASGITFSNYGMVWWRQAPGKQREFVASISSGRDTNYADFVKGRFTISRDNAKNTVHLQMNSLKPEDTAVYYCYTVTDRSDYWGQGTQVTVS
S1-RBD-41	RBD	MAQVQLVESGGGLVQAGGSLRLSCAASGITFSRSAVGWHRQAPGKPREWVAAISNSGTTSYTDPMKGRVTISRDNAKNTVYLQMINLKPEDTAVYYCYIADGLLGGDYWGQGTQVTVS
S1-RBD-43	RBD	MAQVQLVESGGGLVQAGGSLRLSCAASGSTFSSDVITWYRQPPGKQREWVASIQSSGSRNYAASVKGRFTISRENAKNTVYLQMNSLKPEDTGVYYCHAGHVTGGDSWGQGTQVTVS
S1-RBD-44	RBD	MAQVQLVESGGGLVQAGGSLRLSCAASSSTVSNSPMDWFRQAPGKQREFVATVQSGGNASYSYSVKGRFTISRDNAKKMVYLQMNSLKPEDTAVYYCHAADDRSDYWGQGTQVTVS
S1-RBD-45	RBD	MAQVQLVESGGGLVQAGGSLRLSCLASGITWMPYGMEWYRQAPGKQRVFVATISSNGRTNYAASVMGRFTISRDNAKNTVYLQMNSLKPEDTAVYYCHGATALSDYWGQGTQVTVS
S1-RBD-46	RBD	MAEVQLVESGGGLVQAGGSLRLSCAASESTLGSYAIGWFRQAPGKEREGVSFISRDGSTTFYTSSVRGRFTISRDNTKNMVYLQMDGLKPEDTAVYYCAASKITAWDTIIVSAIEYTYWGQGTQVTVS
S1-RBD-47	RBD	MAQVQLVESGGGLAQTGGSLRLSCAASGISFSTYDMNWFRQTPGKQQEWVAGIGTLNSPRYANAVKGRFTISRDDAKNTVYLQMNSLKPEDTAVYYCNTASDRDYWGQGTQVTVS
S1-RBD-48	RBD	MAQVQLVESGGGWVQAGGSLRLSCSASGRTFDNYNIGFIEWFRQAPGKERTFVATISRSGDITNYAGSVAGRFTISRDNNKNTVYLQMNSLKPEDTAVYYCHMSMTTGGDYWGQGTQVTVS
S1-RBD-49	RBD	MAQVQLVESGGGLVQAGGSLRLSCTSSASTFSIGAMGWFRQAPGKQREFVATITSSGTTSYAGSVKGRFTISRENAKNSVYLQMNTLKPEDTAVYYCYANNLHGGDYWGQGTQVTVS
S1-RBD-51	RBD	MAQVQLVESGGGLVQAGGSLRLSCVASGRTLSTYRMGWFRQAPGKERKFVAAIFWSGGHTVYEDSVKGRFTISTDNAQNTVYLQMNSLKPEDTAAYYCAARNPATGNYDYWGQGTQITVS
S2-1	S2	MAQVQVVESGGGLVQAGGSLRLSCAASTLVLGGYDMRWYRQVPGNGRELVASISNGGSTDYADFVKGRFTISSDVAKNTVYLQMDSLKSEDTAVYYCNMRSTYYGIDYWGRGTQVTVS
S2-2	S2	MAQVRLVESGGGLAQAGGSLRLSCAASGLQFSRITMAWYRQAPGKQRELVATLSTRGTTNYPDSVKGRFTISRDNAKNMVYLQMNSLKPEDTAVYYCNTGPGYKTDYWGQGTQVTVS
S2-3	S2	MAQILVTQSGGGLVQTGGSLRLSCAASTLVLGGYDMRWYRQAPGKERELVASITNGGDTRYVDSVKGRFTISSDNAKNAVYLQMDSLKSEDTAVYYCNMHSTYYGRDFWGQGTQVTVS
S2-4	S2	MTQVQLVESGGGLVQAGDSLRLSCVSSEPTFSSRTMGWFRQAPGKERDNVATIPWWRGALPYYKDSVKGRFTISRDSAKNTMYLQMNSLKPEDTAVYYCAASKTWSPSTGVATEYEFRGQGTQVTVS
S2-5	S2	MAQVQLVESGGGLVQAGGSLRLSCGASGLTFKNYAMGWFRQPPGKEREFVATINSIGGPANYANSVKGRFTISRDNAKNTVYLQMNSLKPEDTAVYYCAAERTPSTLLAGSSNPSRVDVWGQGTQVTVS
S2-6	S2	MTQVQLVESGGGLVQAGGSLRLSCAASAGIFGGSTMGWYRQAPGEQREMVATISNSGSANYADSVKGRFTISRDHAKRTVYLQMDSLKPEDTAVYYCNKHSIYYGRDYWGQGTQVTVS
S2-7	S2	MTQVQLVESGGGLVQAGDSLRLSCVASEPTFSSRTMGWFRQAPGKERESVAAIPWWKGALPYYKDSVKGRFTISRDSAKNTMYLQMNSLKPEDTAVYYCAASKTWSPYTDAATELEFRGQGTQVTVS
S2-9	S2	MLQVQLVESGGGLVQAGGSLRLSCAASGSTFSTYGVAWYRQAPGKQRELVASINSWGWINYADSVKGRFTISRDNAKNTVSLQMNSLKPEDTAVYTCNSQNSRGDNYWGQGTQVTVS
S2-10	S2	MAQVQLVESGGGLVQTGGSLRLSCAASGRIVSSSAMSWFRQAPGKEREFVAVIASSNSHTYYADAVKGRFTISRDNAKNTVYLQMNSLKPEDTAIYYCAARSHLTIAAWERLKTYDDWGQGTQVTVS
S2-11	S2	MAQVQLVESGGGLVQPGGSLRLSCAASGRTFSGATMGWFRQAPGKEREFVASILWRYEYTNYANSVKGRFTISADKAKNTVYLQMNSLKPEDTAVYYCACAIERSGIYYHEDSNKYQYWGQGTQVSVS
S2-13	S2	MAQVQLVESGGGLVQPGGSLRLSCAASGFTMTYYTMTWFRQAPGKEREWVSSSRITGNTYYTDSVKGRFTISRDNAKSTVYLQMNSLKPEDTATYYCASGRNINYYTNSAQYDYWGRGTQVTVS
S2-14	S2	MAQVQLVESGGGLVQTGGSLRLSCAPSGRTFSPYAMGWFRQAPGKEREFVSGIGWYSGTTYYADSVKGRFTISSDIIKNTLTLQMNSLKPEDTAVYYCAASKDRYGNMDPNGVRYDYWGQGTQVTVS
S2-15	S2	MAQVQLVESGGGLVQAGGSLRLSCAASGRTFSWYNMAWFRQAPGKEREFVAGISLTDISRSGGNTYYADSVKGRFTISRDNAKNTVYMQMDSLKPEDTAVYYCAADDRRMPAAIMTSVRDYVYRGQGTQVTVS
S2-18	S2	MTQVQLVESGGGLVQAGDSLRLSCVASESTFSSRTMGWFRQAPGKERDFVAAIPWWIGALPNYKDSVKGRFTISRDSAKNTMYLQMNSLKPEDTAVYYCAASKTWSPRTDVTELEFRGQGTQVTVS
S2-22	S2	MAQVHLAESGGGLVQAGGSLRLSCAASGRTFSWYNLAWFRQTPGKEREFVAGIGRIGGNIYYADSVKGRFTISEDNAKNTVYLKMDSLKPEDTAVYHCAADDRRMPAAIMTSARDYVYWGQGTQVTVS
S2-26	S2	MAQVQLVESGGGLVQAGGSLRLSCAVSGGTFSRYSMGWFRQAPGKEREFVAAISSNDKATYYKDSVKDRFTISRDNAKNTVYLHMNTLKPEDTAVYYCAADPVLKMTPDIMASRYVYWGQGTQVTVS
S2-33	S2	MAQVQLLESGGGLVQPGGSLRLSCVVSGSIANMRVMKWYRQAPGKEREWVGTMFNPGPTMYRDSVKGRFTISRDNAKNTVNLQMNSLKVEDTAVYYCNVVDPRNYEYWGQGTQVTVS
S2-35	S2	MAQVQLVESGGGLVQPGGSLRLSCAASFRISSVEVLGWYRQTPGKERELVATLTRAGTTNYIDAVKGRFTISRDNAKNMLYLQMNSLKPEDTAVYYCNVRDLIGQNFWGQGTHVTVS
S2-36	S2	MAQVQLVESGGGLVQAGGSLRLSCAASGRIATNYVMDWYRQAPGKQQELVASISNDGSTNYADSVKGRFTISRDNAKNTLYLQMNSLKPEDTAVYLCHLKHWWFGFAKYDYWGQGTQVTVS
S2-39	S2	MAQVQLVESGGDLVQAGESLRLSCAASGIIISRYAMDWYRQAPGKQREFVAEISSGGTTNYADSVKGRFTIFRDNAKNTMYLQMNSLKPEDTAVYYCKVSYTTYSGQGTRVTVS
S2-40	S2	MAQVQLVESGGGLVQAGGSLRLSCAASGRTFSWYNLAWFRQAPGKEREFVAGISRIAGNTYYADSVKGRFTISEDNAKNTVYMQMDSLKPEDTAVYHCAADDRWMPAATMTSVRDYVYRGQGTQVTVS
S2-42	S2	MAQVQLVESGGGLVQAGGSLRLSCAASGRTFSWYNLAWFRQAPGKEFEFVGGISRTAGNTYYADSVKGRFTISEDNAKNTVYIQMDSLKPEDTAVYHCAADDRRMAAATMTSVRDYVYRGQGTQVTVS
S2-47	S2	MAQVRVEESGGDLVQAGGSLRLSCTTSAILNTWPMGWYRQAPGKQRELVAQITSGGTTNYADSVKGRFTISRDGRQNIVYLQMNRLKPEDTAVYYCNLRADRDYWGQGTQVTVS
S2-57	S2	MAQVQLVESGGGLVQAGGSLRLSCVASGRIFSSYAMAWFRQAPGKEREFVATITWSGKLTMYQDSVKGRFTISKDNPKNTVYLQMNTLKPEDTALYYCAAHEKGWKQVSPDDVKYWGQGTQVTVS
S2-59	S2	MAQVQLVESGGGQAQAGGSLRLSCAASGRTISNYNMGWFRQAPGKEREFVAAAKWSDINESYADSVKGRFTISRDNAKNTVYLQMNSLKPEDTAVYYCAAAGGYYSDNIRQTDYNYWGQGTQVTVS
S2-62	S2	MAQVQLVESGGGLVQPGGSLRLSCAASGRTFSSAMMGWFRQAPGKEREFVASIDWRYQYRYYADSVKGRFTISRDNAKNTVYLQMNSLKPDDTAVYYCACQIQRDGIYYYEDSSKYQYWGQGTQVSVS
