# Supplementary material for: Highly synergistic combinations of nanobodies that target SARS-CoV-2 and are resistant to escape
Source: eLife. 2021 Dec 15;10:e73027. doi: 10.7554/eLife.73027 (PMC8651292; doi:10.7554/eLife.73027)
Supplement: Figure 3—source data 1. [file elife-73027-fig3-data1.xlsx]

## Sheet: Figure3_RBD
nanobody	RBD-10	RBD-11	RBD-12	RBD-14	RBD-15	RBD-16	RBD-18	RBD-19	RBD-20	RBD-21	RBD-22	RBD-23	RBD-24	RBD-25	RBD-26	RBD-27	RBD-28	RBD-29	RBD-3	RBD-30	RBD-32	RBD-34	RBD-35	RBD-36	RBD-37	RBD-38	RBD-4	RBD-40	RBD-41	RBD-43	RBD-44	RBD-45	RBD-46	RBD-47	RBD-48	RBD-49	RBD-5	RBD-51	RBD-6	RBD-9	S1-1	S1-20	S1-23	S1-27	S1-28	S1-29	S1-31	S1-35	S1-36
RBD-10	0.477207	0.556122	0	0	0.179922	0	0.816912	1	0.769978	0.940819	0.479146	0.511639	0	0.833021	0.901364	1	0.606971	0	0.780075	0	0.889154	0.477778	0.843224	0.752182	0.686068	0.881885	0	1	0.950142	0.72731	0.868068	0.756248	0.867409	0.947083	0.889194	0.967181	0.670738	0.797096	0.824986	0.243938	0.488914	0.625156	0.624151	0.932977	0.934866	0	0.540858	0.531429	0.649728
RBD-11	0.882353	0.0664883	0.539244	0.782703	0.500955	0.49102	0.195262	0.77972	0.273214	0.595686	0.400459	0.379824	0.519679	1	0.663694	0.786105	0.693791	0.19488	0.924812	0.495983	1	0.380808	0.226744	0.793308	1	0.432938	0.121131	0.403515	1.03648	0.934936	0.680675	0.621705	0.59278	0.684758	0.717224	0.579537	0.73944	0.565954	0.804073	0.441986	0.804506	0.720106	0.240691	0	0	0	0	0	0
RBD-12	0	0.539244	0	0	0.785897	0	0	0	0	0	0.724532	0.628148	0	0	0	0	0	0	0	0	0	0	0	0	0	0	0	0	0	0	0	0	0	0	0	0	0	0	0	0.584255	0.746606	0.736508	0.687592	0	0	0	0	0	0
RBD-14	0	0.782703	0	0	0.74359	0	0	0	0	0	0.77131	0.636296	0	0	0	0	0	0	0	0	0	0	0	0	0	0	0	0	0	0	0	0	0	0	0	0	0	0	0	0.714286	0.856496	0.744444	0.578287	0	0	0	0	0	0
RBD-15	0.40608	0.543533	0.785897	0.74359	0.125237	0.0895899	0.492744	0.00629371	0.48265	0.643252	0.191798	0.365615	0.481388	0.372108	0.194124	0.703158	0.0875434	0.529338	-0.0883459	0.102946	0.61919	0.214141	0.973077	0.920195	0.771311	0.479495	0.539432	0.362776	0.712606	0.671778	0.4268	0.549812	0.554993	0.470375	0.385354	0.47027	0.0447837	0.493747	0.168409	0.512539	0.0115385	0.751349	0.987179	0.773428	0.716475	0	1	0.401905	1
RBD-16	0	0.954121	0	0	0.685641	0.837723	0.223449	0	0.268479	0	0.610025	-0.0985556	0.612574	0	0	0	1	0.334749	0	0.483785	0	0	0	0	0	0.0407816	1	-0.0475786	0	0	0	0	0	0	0	0	0	0	0	0.557718	0.856496	0.52963	0.578287	0	0	0	0	0	0
RBD-18	0.816912	0.419843	0	0	0.506005	0.969713	0.289295	0	0.269452	0	0.77389	-0.0590078	0.703394	0	0	0	0.796761	0.110183	0	0.476049	0	0	0	0.458088	0	0.249086	0.251175	0.00992167	0	0	0	0	0	0	0	0	0	0	0	-0.341176	0.667098	0.503704	0.210294	0	0	0	0	0	0
RBD-19	1	0.77972	0	0	0.00629371	0	0	0	0	0	0	0.551748	0	0	0	0	0	0	0	0	0	0	0	0.404196	0	0	0	0	0	0	0	0	0	0	0	0	0	0	0	0.418881	0	0	0.644056	0	0	0	0	0	0
RBD-20	0.769978	0.468635	0	0	0.671218	0.442066	0.195572	0	0.176015	0	0.61476	-0.0568266	0.660517	0	0	0	0.571539	0.264207	0	0.442428	0	0	0	0.768653	0	0.203321	0.0531365	-0.00738007	0	0	0	0	0	0	0	0	0	0	0	0.500662	0	0	-0.00397351	0	0	0	0	0	0
RBD-21	0.940819	0.595686	0	0	0.643252	0	0	0	0	0	0	1	0	0	0	0	0	0	0	0	0	0	0	0.68031	0	0	0	0	0	0	0	0	0	0	0	0	0	0	0	0.707412	0	0	0.197456	0	0	0	0	0	0
RBD-22	0.479146	0.807942	0.724532	0.77131	0.11953	1	0.866288	0	0.511345	0	0.245948	0.430713	0.555511	0	0	0	0.153105	0.450162	0	0.14579	0	0	0.867464	0.756207	0	0.720827	0.895057	0.648703	0	0	0	0	0	0	0	0	0	0	0	0.285005	0.162682	0.48836	0.983368	0	0	0	0	0	0
RBD-23	0.776105	0.352691	0.628148	0.636296	0.563686	0.431669	0.241192	0.551748	0.113434	1	0.581107	-0.147503	0.574526	0.744215	0.507345	0.589474	0.366757	0.101432	0.818139	0.428444	0.612634	0.339394	0.592593	0.728023	0.122823	0.239644	0.173829	0.0193573	0.411431	0.0853709	0.50844	0.391304	0.633266	0.469019	0.636314	0.420463	0.913995	0.250908	0.816181	0.366197	0.711852	0.247406	0.283147	0.194543	0.135802	0	0.289391	1	0.213249
RBD-24	0	0.815378	0	0	0.0773357	1	0.772016	0	0.650425	0	0.145731	0.556102	0.527492	0	0	0	0.611261	0.603934	0	0.481107	0	0	0	0	0	0.734019	0.87215	0.603934	0	0	0	0	0	0	0	0	0	0	0	0	0	0	0	0	0	0	0	0	0
RBD-25	0.833021	1	0	0	0.372108	0	0	0	0	0	0	0.744215	0	0	0	0	0	0	0	0	0	0	0	0.433396	0	0	0	0	0	0	0	0	0	0	0	0	0	0	0	0.80863	0	0	0.695435	0	0	0	0	0	0
RBD-26	0.901364	0.663694	0	0	0.194124	0	0	0	0	0	0	0.507345	0	0	0	0	0	0	0	0	0	0	0	0.651626	0	0	0	0	0	0	0	0	0	0	0	0	0	0	0	0.658447	0	0	0.784365	0	0	0	0	0	0
RBD-27	1	0.786105	0	0	0.703158	0	0	0	0	0	0	0.589474	0	0	0	0	0	0	0	0	0	0	0	0.742737	0	0	0	0	0	0	0	0	0	0	0	0	0	0	0	0.611789	0	0	0.285474	0	0	0	0	0	0
RBD-28	0.606971	0.693791	0	0	0.0875434	1	0.796761	0	0.571539	0	0.153105	0.366757	0.611261	0	0	0	0	0.419206	0	0	0	0	0	0.993566	0	0.708446	0.699576	0.519476	0	0	0	0	0	0	0	0	0	0	0	0.843432	0	0	1	0	0	0	0	0	0
RBD-29	0	0.0849365	0	0	0.53539	0.32922	0.181851	0	0.115789	0	0.394918	-0.0406534	0.520871	0	0	0	0.419206	0.191652	0	0.44213	0	0	0	0	0	0.0631579	0.0562613	0.106715	0	0	0	0	0	0	0	0	0	0	0	0	0	0	0	0	0	0	0	0	0
RBD-3	0.780075	0.924812	0	0	-0.0883459	0	0	0	0	0	0	0.818139	0	0	0	0	0	0	0	0	0	0	0	0.664944	0	0	0	0	0	0	0	0	0	0	0	0	0	0	0	0.603383	0	0	0.775376	0	0	0	0	0	0
RBD-30	0	0.495983	0	0	0.102946	0.483785	0.476049	0	0.442428	0	0.14579	0.428444	0.481107	0	0	0	0	0.44213	0	0	0	0	0	0	0	0.431122	0.500446	0.402559	0	0	0	0	0	0	0	0	0	0	0	0	0	0	0	0	0	0	0	0	0
RBD-32	0.889154	1	0	0	0.61919	0	0	0	0	0	0	0.612634	0	0	0	0	0	0	0	0	0	0	0	0.354589	0	0	0	0	0	0	0	0	0	0	0	0	0	0	0	0.728844	0	0	0.900477	0	0	0	0	0	0
RBD-34	0.477778	0.380808	0	0	0.214141	0	0	0	0	0	0	0.339394	0	0	0	0	0	0	0	0	0	0	0	0.491919	0	0	0	0	0	0	0	0	0	0	0	0	0	0	0	0.506061	0	0	1	0	0	0	0	0	0
RBD-35	0.843224	0.7085	0	0	0.977546	0	0	0	0	0	0.867464	0.659984	0	0	0	0	0	0	0	0	0	0	0	0.938653	0	0	0	0	0	0	0	0	0	0	0	0	0	0	0	0.944266	0.848093	0.431746	0.575782	0	0	0	0	0	0
RBD-36	1	0.886551	0	0	0.395242	0	0.458088	0.404196	0.768653	0.68031	0.756207	0.703568	0	0.433396	0.651626	0.742737	0.993566	0	0.664944	0	0.354589	0.491919	0.938653	0.403477	0.687443	0.581951	0	0.444444	0.824483	0.58765	0.504306	0.701814	0.691296	0.626866	0.573779	0.606178	0.904326	0.621622	0.992845	0.655993	0.73394	0.533831	0.929552	0.7414	0.740741	0	0.590519	0.883175	0.585753
RBD-37	0.686068	1	0	0	0.771311	0	0	0	0	0	0	0.122823	0	0	0	0	0	0	0	0	0	0	0	0.687443	0	0	0	0	0	0	0	0	0	0	0	0	0	0	0	0.747479	0	0	0.323098	0	0	0	0	0	0
RBD-38	0.881885	0.775801	0	0	0.451957	1	0.425267	0	0.306643	0	0.822657	-0.270073	0.833333	0	0	0	0.708446	0.138197	0	0.431122	0	0	0	0.581951	0	0.316133	0.16548	0.0599051	0	0	0	0	0	0	0	0	0	0	0	0.380889	0.474858	0	0.106227	0.202131	0.323676	0.208125	0.186813	0.474192	0.044622
RBD-4	0	0.184837	0	0	0.574875	0.572368	0.197368	0	0.204887	0	0.536654	0.39599	0.594298	0	0	0	0.699576	0.238722	0	0.500446	0	0	0	0	0	0.242168	0.108083	0.235276	0	0	0	0	0	0	0	0	0	0	0	0	0	0	0	0	0	0	0	0	0
RBD-40	1	0.724292	0	0	0.337154	1	0.360918	0	0.260545	0	0.796583	0.642789	0.707421	0	0	0	0.519476	0.23118	0	0.402559	0	0	0	0.444444	0	0.234917	0.325147	0.0613988	0	0	0	0	0	0	0	0	0	0	0	0.433301	0	0	0.186883	0	0	0	0	0	0
RBD-41	0.950142	1.03648	0	0	0.712606	0	0	0	0	0	0	0.411431	0	0	0	0	0	0	0	0	0	0	0	0.824483	0	0	0	0	0	0	0	0	0	0	0	0	0	0	0	0.851236	0	0	0.622213	0	0	0	0	0	0
RBD-43	0.72731	0.934936	0	0	0.671778	0	0	0	0	0	0	0.0853709	0	0	0	0	0	0	0	0	0	0	0	0.58765	0	0	0	0	0	0	0	0	0	0	0	0	0	0	0	0.568172	0	0	0.47327	0	0	0	0	0	0
RBD-44	0.868068	0.680675	0	0	0.4268	0	0	0	0	0	0	0.50844	0	0	0	0	0	0	0	0	0	0	0	0.504306	0	0	0	0	0	0	0	0	0	0	0	0	0	0	0	0.502928	0	0	0.430245	0	0	0	0	0	0
RBD-45	0.756248	0.621705	0	0	0.549812	0	0	0	0	0	0	0.391304	0	0	0	0	0	0	0	0	0	0	0	0.701814	0	0	0	0	0	0	0	0	0	0	0	0	0	0	0	0.799384	0	0	0.655597	0	0	0	0	0	0
RBD-46	0.867409	0.59278	0	0	0.554993	0	0	0	0	0	0	0.633266	0	0	0	0	0	0	0	0	0	0	0	0.691296	0	0	0	0	0	0	0	0	0	0	0	0	0	0	0	0.762821	0	0	0.556343	0	0	0	0	0	0
RBD-47	0.947083	0.684758	0	0	0.470375	0	0	0	0	0	0	0.469019	0	0	0	0	0	0	0	0	0	0	0	0.626866	0	0	0	0	0	0	0	0	0	0	0	0	0	0	0	0.715513	0	0	0.383989	0	0	0	0	0	0
RBD-48	0.889194	0.717224	0	0	0.385354	0	0	0	0	0	0	0.636314	0	0	0	0	0	0	0	0	0	0	0	0.573779	0	0	0	0	0	0	0	0	0	0	0	0	0	0	0	0.574054	0	0	0.440483	0	0	0	0	0	0
RBD-49	0.967181	0.579537	0	0	0.47027	0	0	0	0	0	0	0.420463	0	0	0	0	0	0	0	0	0	0	0	0.606178	0	0	0	0	0	0	0	0	0	0	0	0	0	0	0	0.701544	0	0	0.580695	0	0	0	0	0	0
RBD-5	0.670738	0.73944	0	0	0.0447837	0	0	0	0	0	0	0.913995	0	0	0	0	0	0	0	0	0	0	0	0.904326	0	0	0	0	0	0	0	0	0	0	0	0	0	0	0	0.822392	0	0	0.988804	0	0	0	0	0	0
RBD-51	0.797096	0.565954	0	0	0.493747	0	0	0	0	0	0	0.250908	0	0	0	0	0	0	0	0	0	0	0	0.621622	0	0	0	0	0	0	0	0	0	0	0	0	0	0	0	0.674466	0	0	0.516741	0	0	0	0	0	0
RBD-6	0.824986	0.804073	0	0	0.168409	0	0	0	0	0	0	0.816181	0	0	0	0	0	0	0	0	0	0	0	0.992845	0	0	0	0	0	0	0	0	0	0	0	0	0	0	0	0.974133	0	0	0.95377	0	0	0	0	0	0
RBD-9	0.741738	0.618739	0.584255	0.714286	0.74276	0.557718	0.621849	0.418881	0.500662	0.707412	0.553737	0.602726	0	0.80863	0.658447	0.611789	0.843432	0	0.603383	0	0.728844	0.506061	0.572313	0.783305	0.747479	0.380889	0	0.433301	0.851236	0.568172	0.502928	0.799384	0.762821	0.715513	0.574054	0.701544	0.822392	0.674466	0.974133	0.325724	0.717824	0.480697	0.915162	0.290036	0.440187	0	0.325508	0.266032	0.343466
S1-1	0.488914	0.850032	0.746606	0.856496	0.291074	0.856496	0.667098	0	0	0	0.281189	0.798966	0	0	0	0	0	0	0	0	0	0	0.848093	0.73394	0	0.474858	0	0	0	0	0	0	0	0	0	0	0	0	0	0.351336	-0.0643843	0.639683	0.684722	0.605519	0.914154	1	0.722024	0.100664	0.633623
S1-20	0.625156	0.720106	0.736508	0.744444	0.751349	0.52963	0.503704	0	0	0	0.48836	0.247406	0	0	0	0	0	0	0	0	0	0	0.431746	0.533831	0	0	0	0	0	0	0	0	0	0	0	0	0	0	0	0.480697	0.639683	0	0.263595	0	0	0	0	0	0
S1-23	0.69238	0.491137	0.687592	0.578287	0.496026	0.578287	0.404727	0.644056	-0.00397351	0.197456	0.847858	0.284712	0	0.695435	0.784365	0.285474	1	0	0.775376	0	0.900477	1	0.400295	0.41842	0.323098	0.106227	0	0.186883	0.622213	0.47327	0.430245	0.655597	0.556343	0.383989	0.440483	0.580695	0.988804	0.516741	0.95377	0.167835	0.973412	0.263595	0.0897616	0.138988	0.714184	0.719886	0.407698	0.854597	0.0349252
S1-27	0.932977	0	0	0	0.773428	0	0	0	0	0	0	0.194543	0	0	0	0	0	0	0	0	0	0	0	0.7414	0	0.202131	0	0	0	0	0	0	0	0	0	0	0	0	0	0.290036	0.713983	0	0.319692	0.09375	0.523305	0.522775	0.192797	0.685911	0.167903
S1-28	0.934866	0	0	0	0.716475	0	0	0	0	0	0	0.135802	0	0	0	0	0	0	0	0	0	0	0	0.740741	0	0.323676	0	0	0	0	0	0	0	0	0	0	0	0	0	0.440187	0.943517	0	0.312048	0.223969	0.587917	0.358546	0.277014	0.736248	0.177308
S1-29	0	0	0	0	0	0	0	0	0	0	0	0	0	0	0	0	0	0	0	0	0	0	0	0	0	0.208125	0	0	0	0	0	0	0	0	0	0	0	0	0	0	0.878322	0	0.85035	0.763636	0.455944	0.280653	0.89324	0.881119	0.321678
S1-31	0.540858	0	0	0	1	0	0	0	0	0	0	0.289391	0	0	0	0	0	0	0	0	0	0	0	0.590519	0	0.186813	0	0	0	0	0	0	0	0	0	0	0	0	0	0.325508	0.519912	0	0.163676	0.213567	0.339168	0.650328	0.28709	0.736543	0.181182
S1-35	0.531429	0	0	0	0.401905	0	0	0	0	0	0	1	0	0	0	0	0	0	0	0	0	0	0	0.883175	0	0.474192	0	0	0	0	0	0	0	0	0	0	0	0	0	0.266032	-0.0398249	0	0.614004	0.608753	0.70547	0.938731	1	0.14267	0.771991
S1-36	0.649728	0	0	0	1	0	0	0	0	0	0	0.213249	0	0	0	0	0	0	0	0	0	0	0	0.585753	0	0.044622	0	0	0	0	0	0	0	0	0	0	0	0	0	0.343466	0.672662	0	0.18705	0.521133	0.491457	0.428058	0.497302	1	0.245953
S1-37	0.647226	0.541479	0.820579	0.760772	0.81126	0.760772	0.649518	0	0	0	0.713183	0.170109	0	0	0	0	0	0	0	0	0	0	0.599357	0.577967	0	0	0	0	0	0	0	0	0	0	0	0	0	0	0	0.44836	1	0	0.369785	0	0	0	0	0	0
S1-39	0.388398	0	0	0	0.61034	0	0	0	0	0	0	0.97604	0	0	0	0	0	0	0	0	0	0	0	0.869483	0	0.370962	0	0	0	0	0	0	0	0	0	0	0	0	0	0.667087	-0.0368421	0	0.685263	0.787368	0.894737	0.986842	1	0.00473684	0.608947
S1-4	0.4741	0	0	0	0.278244	0	0.827941	0.413986	0.849007	0.884956	0.142999	0.720276	0	0.818011	0.819517	0.810105	0.326005	0	0.18515	0	0.650179	0.585859	1.1235	0.722743	0.875802	0.450216	0	0.553964	1.13782	0.734356	0.69411	1	0.883266	0.848033	0.729567	0.860618	0.217303	1	0.116676	0.393192	0.0323187	1	0.703495	0.54829	0.765126	0.695227	0.624201	0.0646374	0.490417
S1-46	0.539245	0	0	0	1	0	0	0	0	0	0	0.493424	0	0	0	0	0	0	0	0	0	0	0	0.423844	0	0.318015	0	0	0	0	0	0	0	0	0	0	0	0	0	0.485363	0.877049	0	0.940178	0.854098	0.873224	0.314208	0.918579	0.877596	0.740437
S1-48	0.75651	0.514864	0.724225	0.657812	0.738281	0.608889	0.401012	0	0	0	0.766984	0.203559	0	0	0	0	0	0	0	0	0	0	0.511111	0.623698	0	0	0	0	0	0	0	0	0	0	0	0	0	0	0	0.383681	0.910476	0	0.240017	0	0	0	0	0	0
S1-6	-0.000948767	0.678368	0	0	1	0	0.984559	0.982517	0.790728	0.938606	0.442403	0.180266	0	0.749844	1	0.843789	0.695442	0	1	0	0.611442	0.826263	1.002	0	0.76352	0.422244	0	0.874881	0.98865	0.891007	1	0.900719	1	1	1	1	0.640204	0.866882	0.774353	0	0.012527	0.784973	0.455292	0.457883	0.744708	0.857883	0.570194	0.07473	0.634125
S1-62	0.631294	0.471895	0.570437	0.624566	0.627965	0.624566	0.403192	0	0	0	0.8161	0.275073	0	0	0	0	0	0	0	0	0	0	0.52186	0.499792	0	0	0	0	0	0	0	0	0	0	0	0	0	0	0	0.361631	0.637363	0.290476	0.171452	0	0	0	0	0	0
[truncated: 7 more columns]

## Sheet: Figure3_S1-nonRBD
nanobody	S1-10	S1-11	S1-17	S1-2	S1-24	S1-25	S1-3	S1-30	S1-32	S1-41	S1-49	S1-50	S1-58	S1-60	S1-7	S1-9
S1-10	1.4401	1.12587	4.2236	2.20916	2.78908	1.42533	2.75988	2.79712	2.3755	1.74542	3.00844	1.35918	1.17236	2.48363	3.05677	1.20504
S1-11	2.83095	1.57432	10.2051	4.6125	5.45176	2.19759	6.82806	8.92294	5.31199	4.28203	7.02015	3.0985	1.57089	6.53997	7.66215	1.7844
S1-17	1.39378	1.05408	1.05854	1.15979	1.0891	1.09085	1.26465	1.18675	1.50369	0.933287	1.34397	1.19883	0.902242	1.10853	2.20411	0.978053
S1-2	1.27348	1.11131	2.57271	1.43864	1.09725	1.2438	1.08642	1.03796	2.00627	0.985518	1.36709	1.17076	0.871246	1.26394	2.36287	1.08727
S1-24	2.46619	1.40059	4.56018	2.03733	1.00806	1.43133	1.15449	1.41708	2.65807	1.23532	1.79103	1.79713	0.837231	1.81037	4.43892	1.21625
S1-25	4.54371	1.92533	11.8863	3.29932	3.82269	1.23331	4.88906	5.3943	4.24214	2.55295	4.53726	2.78534	1.30523	4.03429	8.68997	1.0466
S1-3	1.37067	1.21231	2.77324	1.55046	1.02161	1.17337	1.02963	1.08087	1.68193	0.981291	2.43159	1.10154	0.823168	1.32674	3.00252	1.10771
S1-30	2.11277	1.38554	4.63364	1.84948	0.98769	1.40295	1.12406	1.30627	2.52158	1.15806	1.65994	1.68683	0.837138	1.70194	4.07458	1.23562
S1-32	1.52363	1.21549	3.11	1.43406	1.32454	1.17511	1.80212	1.91618	1.18534	1.11553	1.61696	1.37158	0.968364	1.4962	2.55486	1.04218
S1-41	2.09412	1.34374	4.83661	1.89324	1.01469	1.3726	1.1452	1.27414	2.55037	1.1568	1.70315	1.57642	0.832177	1.6669	3.99788	1.18251
S1-49	1.47369	1.19732	2.87549	1.31851	0.777218	1.20134	0.817723	0.766371	1.85983	0.864549	1.08224	1.25356	0.812871	1.13912	2.63527	1.04955
S1-50	1.72259	1.18437	4.0983	1.56235	1.31909	1.27085	1.33188	1.40877	2.26153	1.12018	1.68039	1.33226	0.903846	1.73597	3.09893	1.10167
S1-58	5.56175	2.34828	22.2571	5.66091	5.27429	2.62085	5.62451	7.94996	6.82814	4.5374	8.41575	4.32775	1.40511	7.51806	11.5284	2.13517
S1-60	1.42355	1.20481	3.17801	1.40454	0.986444	1.20908	1.06412	1.09967	1.98523	0.998157	1.41575	1.27376	0.848821	1.30859	2.63279	1.06211
S1-7	0.93278	0.965196	1.70842	1.5852	1.59345	1.07762	1.48078	1.22951	1.40688	1.02311	1.62706	1.01473	0.943908	1.24047	1.10674	0.937711
S1-9	3.38737	2.17422	11.7878	5.09421	6.67572	1.50499	6.95483	6.33833	5.9887	3.44917	8.05568	3.23658	1.7605	5.05086	9.73296	1.17811

## Sheet: Figure3_S2
nanobody	CoV2-S2-1	CoV2-S2-10	CoV2-S2-13	CoV2-S2-18	CoV2-S2-2	CoV2-S2-26	CoV2-S2-3	CoV2-S2-33	CoV2-S2-35	CoV2-S2-36	CoV2-S2-4	CoV2-S2-40	CoV2-S2-42	CoV2-S2-47	CoV2-S2-5	CoV2-S2-57	CoV2-S2-62	CoV2-S2-7	CoV2-S2-9
CoV2-S2-1	1.07988	1.35698	1.76097	25.8981	1.87955	8.88017	1.03116	7.98554	1.14291	1.20009	1.83619	1.87787	6.06404	1.06106	1.41175	1.19711	1.26037	4.70234	1.32433
CoV2-S2-10	3.37723	1.22302	2.91964	-126.926	1.30225	36.9977	2.63253	8.94614	2.57166	2.53574	32.0682	2.40555	14.6172	2.16173	2.19942	1.15635	2.02585	58.9417	1.9878
CoV2-S2-13	2.10725	1.40284	1.14466	-55.7985	1.35918	17.9837	1.72865	5.15499	1.85239	1.56498	22.2886	1.5822	7.18278	1.52224	1.62762	1.28132	1.08377	35.1816	1.39984
CoV2-S2-18	0.910712	0.972553	0.94578	-0.233197	0.954314	1.08202	0.951767	1.09551	1.02431	0.757102	1.15297	0.963937	1.16532	0.928089	1.00267	0.885072	0.95547	1.50716	0.924557
CoV2-S2-2	2.9789	1.17256	2.66601	1116.09	1.05637	32.8728	2.49689	9.02229	2.61986	2.44412	7.34645	2.24058	13.2588	2.24681	2.32221	1.12466	2.02035	29.1618	1.85191
CoV2-S2-26	0.991165	1.01539	0.987712	-3.29624	0.984367	1.81414	1.00184	1.34029	1.07844	0.812121	3.15401	1.01007	1.65871	0.968984	1.04329	0.91071	0.977021	5.15903	0.957492
CoV2-S2-3	1.85579	1.52504	2.11612	-157.646	1.58819	23.4059	1.35536	6.3911	1.36511	1.56875	9.70331	2.1387	9.11651	1.18374	1.21494	1.38854	1.49712	27.8274	1.35183
CoV2-S2-33	1.17511	1.09474	1.14674	-12.5888	1.05806	4.77214	1.13962	1.29375	1.17786	0.956436	7.08316	1.12519	2.69898	1.02484	1.1226	0.955995	1.0508	13.8282	1.05344
CoV2-S2-35	1.83416	0.907813	2.11764	-61.3152	1.52649	19.4008	1.38165	6.07879	1.36191	1.00064	35.8727	2.0962	8.6952	1.23751	1.20457	1.47476	1.63316	78.3005	1.1564
CoV2-S2-36	1.62142	1.38341	1.7537	-30.3812	1.37	12.4977	1.23309	4.53384	1.27025	1.24707	23.3025	1.35818	6.45566	1.20104	1.14063	1.42694	1.57406	33.6284	1.06371
CoV2-S2-4	0.965266	0.993145	0.986258	-5.46119	0.985669	1.54106	0.974983	1.33939	1.06185	0.807364	1.33455	0.99628	1.38144	0.945434	1.03161	0.909345	0.974098	1.97421	0.945141
CoV2-S2-40	2.91084	1.66541	2.12661	-43.4257	1.5953	19.6638	2.40523	6.02512	2.20988	1.86718	34.4076	1.40699	8.77918	1.85082	1.97801	1.54554	1.63166	60.4575	1.62988
CoV2-S2-42	1.43301	1.05802	1.08548	-6.07701	1.03343	3.41931	1.40125	1.69104	1.26166	0.983533	6.07279	0.986993	1.98418	1.1736	1.22689	1.03033	1.08433	11.3861	1.06093
CoV2-S2-47	2.10461	1.64899	2.25223	-46.4103	1.57345	21.3851	1.51462	6.73235	1.49519	1.64361	42.268	2.17682	10.7806	1.32302	1.27107	1.59052	1.76332	82.319	1.17468
CoV2-S2-5	2.19493	1.67587	2.39918	-126.189	1.70585	27.8531	1.5111	7.00375	1.50098	1.80172	21.0752	2.26775	11.3216	1.28681	1.25562	1.52639	1.67098	45.4315	1.19157
CoV2-S2-57	3.61568	1.12301	2.79819	-69.8787	1.03319	29.9722	2.7689	9.51754	2.81904	2.48691	57.1573	2.36249	14.2595	2.34335	2.37491	1.07665	2.08297	107.474	1.97215
CoV2-S2-62	3.1678	1.85209	1.98692	-59.7295	1.69368	27.6278	2.55094	8.27201	2.43035	2.22894	50.7069	2.166	12.9508	2.01168	2.12646	1.62754	1.1819	91.6467	1.8742
CoV2-S2-7	0.952249	0.989878	0.986976	-14.1109	0.979886	1.36962	0.972424	1.27182	1.06048	0.805055	1.37143	0.990172	1.37395	0.939609	1.02505	0.902463	0.967208	1.86238	0.94378
CoV2-S2-9	2.8209	1.82777	2.61394	-204.455	1.80075	29.4159	2.15256	7.98731	1.68381	2.01651	23.504	2.24131	12.565	1.44341	1.37136	1.6489	1.86084	38.9205	1.17395
