# Supplementary material for: Highly synergistic combinations of nanobodies that target SARS-CoV-2 and are resistant to escape
Source: eLife. 2021 Dec 15;10:e73027. doi: 10.7554/eLife.73027 (PMC8651292; doi:10.7554/eLife.73027)
Supplement: Figure 5—source data 1. [file elife-73027-fig5-data1.xlsx]

## Sheet: Figure5A
nanobody	[nb]	effect
S1-1	0.773333	0.936674
S1-1	0.257778	0.995665
S1-1	0.0859259	0.990745
S1-1	0.028642	0.995957
S1-1	0.00954733	0.988796
S1-1	0.00318244	0.786639
S1-1	0.00106081	0.469033
S1-1	0.000353605	0.191371
S1-1	0	0
S1-4	4.85	0.753027
S1-4	1.61667	0.636117
S1-4	0.538889	0.322895
S1-4	0.17963	0
S1-4	0.0598765	0.0793319
S1-4	0.0199588	0.1865
S1-4	0.00665295	0.181628
S1-4	0.00221765	0.205985
S1-4	0	0
S1-23	1.43333	0.994154
S1-23	0.477778	0.99318
S1-23	0.159259	0.983438
S1-23	0.0530864	0.983925
S1-23	0.0176955	0.925957
S1-23	0.00589849	0.929854
S1-23	0.00196616	0.558177
S1-23	0.000655388	0.545024
S1-23	0	0
S2-10	4.6	0.91183
S2-10	1.53333	0.757411
S2-10	0.511111	0.361865
S2-10	0.17037	0.6254
S2-10	0.0567901	0.582046
S2-10	0.01893	0.434934
S2-10	0.00631001	0.337509
S2-10	0.00210334	0
S2-10	0	0
S1-RBD-4	0.433333	0.996006
S1-RBD-4	0.144444	0.982951
S1-RBD-4	0.0481481	0.961517
S1-RBD-4	0.0160494	0.663883
S1-RBD-4	0.00534979	0.38135
S1-RBD-4	0.00178327	0.439805
S1-RBD-4	0.000594422	0.098817
S1-RBD-4	0.000198141	0
S1-RBD-4	0	0
S1-RBD-11	1.24333	0.968337
S1-RBD-11	0.414444	0.970772
S1-RBD-11	0.138148	0.951287
S1-RBD-11	0.0460494	0.848504
S1-RBD-11	0.0153498	0.61858
S1-RBD-11	0.0051166	0.483646
S1-RBD-11	0.00170553	0.586917
S1-RBD-11	0.000568511	0.235212
S1-RBD-11	0	0
S1-RBD-23	0.65	0.91865
S1-RBD-23	0.216667	0.877731
S1-RBD-23	0.0722222	0.888935
S1-RBD-23	0.0240741	0.71016
S1-RBD-23	0.00802469	0.747182
S1-RBD-23	0.0026749	0.0744607
S1-RBD-23	0.000891632	0.254697
S1-RBD-23	0.000297211	0.0403619
S1-RBD-23	0	0
LaM2	1	0.0108559
LaM2	0.333333	0.0701461
LaM2	0.111111	0.0826026
LaM2	0.037037	0.0354906
LaM2	0.0123457	0
LaM2	0.00411523	0.0744607
LaM2	0.00137174	0.0647182
LaM2	0.000457247	0
LaM2	0	0.0403619

## Sheet: Figure5C
Sample	Viral copy number Mean	Nucleic Acid(ng/uL)	Viral copy number / RNA content	Viral copy number stddev	concentration
SARS-CoV2 UV treated	921.036	181.243	5.08	1.30937	na
SARS-CoV2 + mock	58682.7	4323.03	407.881	30.0478	na
SARS-CoV2 + rACE2	5837.54	107.97	54.07	2.25628	1000
SARS-CoV2 + S1-1	2203.52	114.057	14.6907	0.760412	6
SARS-CoV2 + S1-1	3089.55	326.791	10.8439	1.14699	60
SARS-CoV2 + S1-1	2413.33	304.549	9.25912	1.16845	600
SARS-CoV2 + S1-23	41399.4	1155.93	201.913	5.6377	7
SARS-CoV2 + S1-23	11737.7	1526.56	90.2103	11.7324	70
SARS-CoV2 + S1-23	1191.7	88.8629	7.30615	0.544807	700
SARS-CoV2 + S1-23-trimer	3444.53	73.5127	16.1514	0.3447	0.11
SARS-CoV2 + S1-23-trimer	1555.67	25.9158	10.2723	0.342395	1.1
SARS-CoV2 + S1-23-trimer	1829.39	60.9768	9.25105	0.154112	11
