# Supplementary material for: Highly synergistic combinations of nanobodies that target SARS-CoV-2 and are resistant to escape
Source: eLife. 2021 Dec 15;10:e73027. doi: 10.7554/eLife.73027 (PMC8651292; doi:10.7554/eLife.73027)
Supplement: Figure 7—source data 1. [file elife-73027-fig7-data1.xlsx]

## Sheet: S1-23_S1-27
nb1.conc	nb2.conc	effect.rep1	effect.rep2
0.716667	0.598333	279	515
0.716667	0.199444	320	161
0.716667	0.0664815	238	187
0.716667	0.0221605	262	445
0.716667	0.00738683	361	429
0.716667	0.00246228	1294	423
0.716667	0.000820759	412	678
0.716667	0.000273586	498	462
0.716667	9.11954e-05	521	626
0.716667	3.03985e-05	508	300
0.716667	1.01328e-05	480	824
0.716667	3.37761e-06	465	702
0.716667	0	446	425
0.238889	0.598333	988	426
0.238889	0.199444	592	698
0.238889	0.0664815	1430	743
0.238889	0.0221605	372	922
0.238889	0.00738683	721	935
0.238889	0.00246228	500	1489
0.238889	0.000820759	1168	280
0.238889	0.000273586	302	864
0.238889	9.11954e-05	745	681
0.238889	3.03985e-05	629	441
0.238889	1.01328e-05	1276	340
0.238889	3.37761e-06	598	1611
0.238889	0	265	1272
0.0796296	0.598333	1125	721
0.0796296	0.199444	1753	1443
0.0796296	0.0664815	2670	1465
0.0796296	0.0221605	1387	1878
0.0796296	0.00738683	1712	2395
0.0796296	0.00246228	2943	1268
0.0796296	0.000820759	859	1539
0.0796296	0.000273586	727	1712
0.0796296	9.11954e-05	1654	2172
0.0796296	3.03985e-05	1382	1403
0.0796296	1.01328e-05	1822	1683
0.0796296	3.37761e-06	1234	1290
0.0796296	0	2094	4340
0.0265432	0.598333	1465	950
0.0265432	0.199444	2651	2079
0.0265432	0.0664815	2143	1734
0.0265432	0.0221605	4530	2113
0.0265432	0.00738683	2493	3466
0.0265432	0.00246228	2092	4121
0.0265432	0.000820759	3949	2017
0.0265432	0.000273586	2801	4454
0.0265432	9.11954e-05	1931	3822
0.0265432	3.03985e-05	2185	3086
0.0265432	1.01328e-05	3262	2598
0.0265432	3.37761e-06	3243	1965
0.0265432	0	5587	7858
0.00884774	0.598333	2094	1083
0.00884774	0.199444	4157	2748
0.00884774	0.0664815	5440	4302
0.00884774	0.0221605	7265	6568
0.00884774	0.00738683	11746	9760
0.00884774	0.00246228	11273	12441
0.00884774	0.000820759	7790	6128
0.00884774	0.000273586	5840	8376
0.00884774	9.11954e-05	7581	10409
0.00884774	3.03985e-05	7509	8447
0.00884774	1.01328e-05	9049	5993
0.00884774	3.37761e-06	6403	13495
0.00884774	0	17810	19545
0.00294925	0.598333	0	666
0.00294925	0.199444	1635	4089
0.00294925	0.0664815	2705	3989
0.00294925	0.0221605	7010	12268
0.00294925	0.00738683	14611	26526
0.00294925	0.00246228	23511	24185
0.00294925	0.000820759	21708	22717
0.00294925	0.000273586	23642	27201
0.00294925	9.11954e-05	24721	26092
0.00294925	3.03985e-05	23147	26341
0.00294925	1.01328e-05	28995	24446
0.00294925	3.37761e-06	29257	34594
0.00294925	0	21514	42573
0.000983082	0.598333	2778	2415
0.000983082	0.199444	2773	4862
0.000983082	0.0664815	4855	5756
0.000983082	0.0221605	19327	13035
0.000983082	0.00738683	27006	25293
0.000983082	0.00246228	44226	43093
0.000983082	0.000820759	41414	40036
0.000983082	0.000273586	36806	39430
0.000983082	9.11954e-05	33357	39014
0.000983082	3.03985e-05	39090	39461
0.000983082	1.01328e-05	42916	43714
0.000983082	3.37761e-06	47285	47559
0.000983082	0	47534	37750
0.000327694	0.598333	1784	3305
0.000327694	0.199444	3194	3530
0.000327694	0.0664815	6394	7932
0.000327694	0.0221605	20130	20034
0.000327694	0.00738683	37890	35790
0.000327694	0.00246228	53510	51164
0.000327694	0.000820759	56179	53208
0.000327694	0.000273586	51006	51744
0.000327694	9.11954e-05	57775	54113
0.000327694	3.03985e-05	52080	47659
0.000327694	1.01328e-05	57346	58261
0.000327694	3.37761e-06	61535	53730
0.000327694	0	38939	42371
0.000109231	0.598333	1254	1900
0.000109231	0.199444	2578	3966
0.000109231	0.0664815	11745	9292
0.000109231	0.0221605	21627	18408
0.000109231	0.00738683	37074	39307
0.000109231	0.00246228	60397	64359
0.000109231	0.000820759	63241	45512
0.000109231	0.000273586	46624	46099
0.000109231	9.11954e-05	56734	43784
0.000109231	3.03985e-05	50491	50383
0.000109231	1.01328e-05	40406	48723
0.000109231	3.37761e-06	48462	55460
0.000109231	0	48540	43405
3.64104e-05	0.598333	436	940
3.64104e-05	0.199444	3781	2629
3.64104e-05	0.0664815	7738	8701
3.64104e-05	0.0221605	22168	20105
3.64104e-05	0.00738683	33748	34022
3.64104e-05	0.00246228	53147	63308
3.64104e-05	0.000820759	54642	47739
3.64104e-05	0.000273586	38081	48955
3.64104e-05	9.11954e-05	45334	50015
3.64104e-05	3.03985e-05	36271	54169
3.64104e-05	1.01328e-05	45826	41307
3.64104e-05	3.37761e-06	45905	43711
3.64104e-05	0	48379	46622
1.21368e-05	0.598333	1384	940
1.21368e-05	0.199444	2312	2006
1.21368e-05	0.0664815	7864	2533
1.21368e-05	0.0221605	22499	8126
1.21368e-05	0.00738683	35031	18995
1.21368e-05	0.00246228	47030	29722
1.21368e-05	0.000820759	53124	58984
1.21368e-05	0.000273586	43608	54567
1.21368e-05	9.11954e-05	52364	42211
1.21368e-05	3.03985e-05	45980	45661
1.21368e-05	1.01328e-05	55271	42142
1.21368e-05	3.37761e-06	43529	49294
1.21368e-05	0	46333	51744
4.0456e-06	0.598333	1205	2106
4.0456e-06	0.199444	2667	3264
4.0456e-06	0.0664815	7619	6846
4.0456e-06	0.0221605	22062	16751
4.0456e-06	0.00738683	33728	32328
4.0456e-06	0.00246228	46752	55197
4.0456e-06	0.000820759	53867	41591
4.0456e-06	0.000273586	48952	43587
4.0456e-06	9.11954e-05	45214	53123
4.0456e-06	3.03985e-05	39601	44125
4.0456e-06	1.01328e-05	49271	47694
4.0456e-06	3.37761e-06	38303	56491
4.0456e-06	0	48375	46369
0	0.598333	653	2106
0	0.199444	292	548
0	0.0664815	987	2869
0	0.0221605	4093	5727
0	0.00738683	22608	21020
0	0.00246228	37709	43548
0	0.000820759	55432	36928
0	0.000273586	48716	46951
0	9.11954e-05	49917	45726
0	3.03985e-05	50762	44793
0	1.01328e-05	47014	49405
0	3.37761e-06	49439	40699
0	0	59691.8	59691.8

## Sheet: S1-1_S1-23
nb1.conc	nb2.conc	effect.rep1	effect.rep2
0.386667	0.716667	38	36
0.386667	0.238889	52	117
0.386667	0.0796296	70	53
0.386667	0.0265432	1139	65
0.386667	0.00884774	163	68
0.386667	0.00294925	482	80
0.386667	0.000983082	47	68
0.386667	0.000327694	63	82
0.386667	0.000109231	112	68
0.386667	3.64104e-05	699	79
0.386667	1.21368e-05	107	75
0.386667	4.0456e-06	96	84
0.386667	0	33	28
0.128889	0.716667	143	50
0.128889	0.238889	74	64
0.128889	0.0796296	114	90
0.128889	0.0265432	77	71
0.128889	0.00884774	177	103
0.128889	0.00294925	93	162
0.128889	0.000983082	51	186
0.128889	0.000327694	63	51
0.128889	0.000109231	249	269
0.128889	3.64104e-05	72	180
0.128889	1.21368e-05	92	108
0.128889	4.0456e-06	109	99
0.128889	0	117	231
0.042963	0.716667	64	80
0.042963	0.238889	71	55
0.042963	0.0796296	73	68
0.042963	0.0265432	92	84
0.042963	0.00884774	93	89
0.042963	0.00294925	106	98
0.042963	0.000983082	74	56
0.042963	0.000327694	121	119
0.042963	0.000109231	70	68
0.042963	3.64104e-05	61	97
0.042963	1.21368e-05	75	157
0.042963	4.0456e-06	95	102
0.042963	0	1109	45
0.014321	0.716667	372	91
0.014321	0.238889	88	347
0.014321	0.0796296	84	80
0.014321	0.0265432	78	90
0.014321	0.00884774	98	504
0.014321	0.00294925	111	402
0.014321	0.000983082	178	616
0.014321	0.000327694	718	755
0.014321	0.000109231	722	944
0.014321	3.64104e-05	193	220
0.014321	1.21368e-05	809	431
0.014321	4.0456e-06	739	1904
0.014321	0	1625	1536
0.00477366	0.716667	85	69
0.00477366	0.238889	487	67
0.00477366	0.0796296	95	61
0.00477366	0.0265432	53	162
0.00477366	0.00884774	256	519
0.00477366	0.00294925	640	1340
0.00477366	0.000983082	3306	1892
0.00477366	0.000327694	5646	4719
0.00477366	0.000109231	6304	4457
0.00477366	3.64104e-05	1273	4897
0.00477366	1.21368e-05	4096	3067
0.00477366	4.0456e-06	2866	3715
0.00477366	0	3065	5950
0.00159122	0.716667	0	68
0.00159122	0.238889	109	71
0.00159122	0.0796296	88	55
0.00159122	0.0265432	91	239
0.00159122	0.00884774	293	128
0.00159122	0.00294925	404	2705
0.00159122	0.000983082	2534	4714
0.00159122	0.000327694	5324	4106
0.00159122	0.000109231	4622	7712
0.00159122	3.64104e-05	4488	7479
0.00159122	1.21368e-05	6477	5938
0.00159122	4.0456e-06	5302	4510
0.00159122	0	4920	5937
0.000530407	0.716667	103	125
0.000530407	0.238889	155	526
0.000530407	0.0796296	551	1746
0.000530407	0.0265432	1102	273
0.000530407	0.00884774	3536	3063
0.000530407	0.00294925	7314	3513
0.000530407	0.000983082	6690	5614
0.000530407	0.000327694	9312	11174
0.000530407	0.000109231	8268	6417
0.000530407	3.64104e-05	7024	7152
0.000530407	1.21368e-05	8507	5284
0.000530407	4.0456e-06	6870	7439
0.000530407	0	6829	10745
0.000176802	0.716667	99	696
0.000176802	0.238889	389	314
0.000176802	0.0796296	500	680
0.000176802	0.0265432	3885	347
0.000176802	0.00884774	2311	5128
0.000176802	0.00294925	6071	8080
0.000176802	0.000983082	10032	6953
0.000176802	0.000327694	8743	11223
0.000176802	0.000109231	8598	13009
0.000176802	3.64104e-05	6383	9246
0.000176802	1.21368e-05	8454	7548
0.000176802	4.0456e-06	6989	13785
0.000176802	0	7310	8278
5.89341e-05	0.716667	15	98
5.89341e-05	0.238889	1024	763
5.89341e-05	0.0796296	973	2527
5.89341e-05	0.0265432	2007	2647
5.89341e-05	0.00884774	6191	4302
5.89341e-05	0.00294925	9487	11879
5.89341e-05	0.000983082	7512	8774
5.89341e-05	0.000327694	10940	8658
5.89341e-05	0.000109231	15687	13935
5.89341e-05	3.64104e-05	7318	9398
5.89341e-05	1.21368e-05	11195	12009
5.89341e-05	4.0456e-06	7139	10541
5.89341e-05	0	11103	6282
1.96447e-05	0.716667	27	137
1.96447e-05	0.238889	152	368
1.96447e-05	0.0796296	688	59
1.96447e-05	0.0265432	1000	1933
1.96447e-05	0.00884774	4950	4202
1.96447e-05	0.00294925	6273	7955
1.96447e-05	0.000983082	10011	7753
1.96447e-05	0.000327694	11944	6937
1.96447e-05	0.000109231	10592	7376
1.96447e-05	3.64104e-05	13145	6199
1.96447e-05	1.21368e-05	5390	15073
1.96447e-05	4.0456e-06	12184	11329
1.96447e-05	0	6581	10278
6.54823e-06	0.716667	61	137
6.54823e-06	0.238889	18	26
6.54823e-06	0.0796296	873	11
6.54823e-06	0.0265432	2627	1798
6.54823e-06	0.00884774	4597	5242
6.54823e-06	0.00294925	5548	5067
6.54823e-06	0.000983082	7632	14045
6.54823e-06	0.000327694	9202	14279
6.54823e-06	0.000109231	8318	8071
6.54823e-06	3.64104e-05	6950	8958
6.54823e-06	1.21368e-05	11035	11003
6.54823e-06	4.0456e-06	8681	9538
6.54823e-06	0	6964	11398
2.18274e-06	0.716667	36	0
2.18274e-06	0.238889	905	1063
2.18274e-06	0.0796296	1220	716
2.18274e-06	0.0265432	1996	2852
2.18274e-06	0.00884774	4846	5802
2.18274e-06	0.00294925	9416	10385
2.18274e-06	0.000983082	11960	9501
2.18274e-06	0.000327694	11777	10272
2.18274e-06	0.000109231	12183	10361
2.18274e-06	3.64104e-05	5017	10279
2.18274e-06	1.21368e-05	9770	10577
2.18274e-06	4.0456e-06	12865	11401
2.18274e-06	0	5896	10265
0	0.716667	48	513
0	0.238889	1168	1737
0	0.0796296	744	2096
0	0.0265432	2366	3049
0	0.00884774	8695	4617
0	0.00294925	8727	11154
0	0.000983082	10480	9554
0	0.000327694	9539	8622
0	0.000109231	12247	6429
0	3.64104e-05	13285	6567
0	1.21368e-05	9618	9960
0	4.0456e-06	7556	11411
0	0	12807.6	12807.6

## Sheet: S1-RBD-15_S1-23
nb1.conc	nb2.conc	effect.rep1	effect.rep2
0.526667	0.716667	109	120
0.526667	0.238889	80	113
0.526667	0.0796296	124	124
0.526667	0.0265432	104	106
0.526667	0.00884774	391	718
0.526667	0.00294925	240	127
0.526667	0.000983082	164	722
0.526667	0.000327694	403	163
0.526667	0.000109231	153	161
0.526667	3.64104e-05	224	196
0.526667	1.21368e-05	211	223
0.526667	4.0456e-06	351	338
0.526667	0	70	117
0.175556	0.716667	158	130
0.175556	0.238889	375	190
0.175556	0.0796296	216	281
0.175556	0.0265432	182	491
0.175556	0.00884774	231	507
0.175556	0.00294925	306	201
0.175556	0.000983082	127	151
0.175556	0.000327694	143	204
0.175556	0.000109231	206	345
0.175556	3.64104e-05	594	172
0.175556	1.21368e-05	285	284
0.175556	4.0456e-06	369	306
0.175556	0	107	96
0.0585185	0.716667	252	127
0.0585185	0.238889	161	200
0.0585185	0.0796296	211	177
0.0585185	0.0265432	534	408
0.0585185	0.00884774	882	386
0.0585185	0.00294925	300	196
0.0585185	0.000983082	187	134
0.0585185	0.000327694	477	502
0.0585185	0.000109231	689	180
0.0585185	3.64104e-05	178	206
0.0585185	1.21368e-05	268	220
0.0585185	4.0456e-06	305	290
0.0585185	0	96	167
0.0195062	0.716667	168	123
0.0195062	0.238889	285	140
0.0195062	0.0796296	164	165
0.0195062	0.0265432	204	319
0.0195062	0.00884774	243	220
0.0195062	0.00294925	243	192
0.0195062	0.000983082	71	193
0.0195062	0.000327694	285	832
0.0195062	0.000109231	1238	378
0.0195062	3.64104e-05	152	147
0.0195062	1.21368e-05	202	185
0.0195062	4.0456e-06	218	232
0.0195062	0	88	177
0.00650206	0.716667	171	167
0.00650206	0.238889	147	137
0.00650206	0.0796296	163	166
0.00650206	0.0265432	292	150
0.00650206	0.00884774	167	163
0.00650206	0.00294925	928	621
0.00650206	0.000983082	2649	957
0.00650206	0.000327694	2886	6619
0.00650206	0.000109231	5056	4414
0.00650206	3.64104e-05	5837.5	4735
0.00650206	1.21368e-05	5125.75	5286.25
0.00650206	4.0456e-06	4930.38	5206
0.00650206	0	342	501
0.00216735	0.716667	0	163
0.00216735	0.238889	156	161
0.00216735	0.0796296	196	280
0.00216735	0.0265432	171	217
0.00216735	0.00884774	180	516
0.00216735	0.00294925	2075	5691
0.00216735	0.000983082	3547	11196
0.00216735	0.000327694	12291	19863
0.00216735	0.000109231	14625	16807
0.00216735	3.64104e-05	17563	17185
0.00216735	1.21368e-05	18713	17949
0.00216735	4.0456e-06	17760	17854.5
0.00216735	0	17472.5	22238
0.000722451	0.716667	264	651
0.000722451	0.238889	299	1362
0.000722451	0.0796296	586	486
0.000722451	0.0265432	1134	2079
0.000722451	0.00884774	10630	10343
0.000722451	0.00294925	19005	20914
0.000722451	0.000983082	30449	28778
0.000722451	0.000327694	29319	28519
0.000722451	0.000109231	41547	32887
0.000722451	3.64104e-05	35033	37217
0.000722451	1.21368e-05	33960	36125
0.000722451	4.0456e-06	35588.5	35042.5
0.000722451	0	31592	34092
0.000240817	0.716667	577	238
0.000240817	0.238889	804	1034
0.000240817	0.0796296	1306	1972
0.000240817	0.0265432	5040	3206
0.000240817	0.00884774	13627	13102
0.000240817	0.00294925	28951	30406
0.000240817	0.000983082	34718	35181
0.000240817	0.000327694	36443	34723
0.000240817	0.000109231	33722	39599
0.000240817	3.64104e-05	34222.5	36660.5
0.000240817	1.21368e-05	36910.8	35441.5
0.000240817	4.0456e-06	36785.6	36176.1
0.000240817	0	31629	31127
8.02723e-05	0.716667	61	714
8.02723e-05	0.238889	502	731
8.02723e-05	0.0796296	3022	1189
8.02723e-05	0.0265432	6589	4041
8.02723e-05	0.00884774	13413	15491
8.02723e-05	0.00294925	37850	29865
8.02723e-05	0.000983082	38757	34346
8.02723e-05	0.000327694	32252	32069
8.02723e-05	0.000109231	36761	44447
8.02723e-05	3.64104e-05	31017	35096
8.02723e-05	1.21368e-05	35487	33033
8.02723e-05	4.0456e-06	38304	32808
8.02723e-05	0	34556	36928
2.67574e-05	0.716667	118	204
2.67574e-05	0.238889	726	1497
2.67574e-05	0.0796296	3006	1294
2.67574e-05	0.0265432	4458	6819
2.67574e-05	0.00884774	16870	11245
2.67574e-05	0.00294925	34390	33512
2.67574e-05	0.000983082	39472	32784
2.67574e-05	0.000327694	32760	42975
2.67574e-05	0.000109231	43419	38094
2.67574e-05	3.64104e-05	33451	33328
2.67574e-05	1.21368e-05	40152	45952
2.67574e-05	4.0456e-06	43791	32249
2.67574e-05	0	36625	36196
8.91915e-06	0.716667	352	204
8.91915e-06	0.238889	706	391
8.91915e-06	0.0796296	3268	1594
8.91915e-06	0.0265432	4719	685
8.91915e-06	0.00884774	20698	3403
8.91915e-06	0.00294925	32860	9101
8.91915e-06	0.000983082	35700	22084
8.91915e-06	0.000327694	28117	27476
8.91915e-06	0.000109231	34301	31882
8.91915e-06	3.64104e-05	34747	29534
8.91915e-06	1.21368e-05	34261	37482
8.91915e-06	4.0456e-06	32534	27574
8.91915e-06	0	35888	31137
2.97305e-06	0.716667	296	157
2.97305e-06	0.238889	854	1063
2.97305e-06	0.0796296	1738	1824
2.97305e-06	0.0265432	5792	6103
2.97305e-06	0.00884774	14097	15095
2.97305e-06	0.00294925	30319	22319
2.97305e-06	0.000983082	32491	32018
2.97305e-06	0.000327694	28102	30663
2.97305e-06	0.000109231	30583	29484
2.97305e-06	3.64104e-05	30903	29547
2.97305e-06	1.21368e-05	35627	22426
2.97305e-06	4.0456e-06	25402	29417
2.97305e-06	0	28244	33037
0	0.716667	143	327
0	0.238889	385	413
0	0.0796296	1110	205
0	0.0265432	1637	1765
0	0.00884774	9942	14900
0	0.00294925	32167	32360
0	0.000983082	34396	27401
0	0.000327694	31381	28648
0	0.000109231	36597	31420
0	3.64104e-05	26843	36649
0	1.21368e-05	37291	34437
0	4.0456e-06	31353	32020
0	0	35705.6	35705.6

## Sheet: S1-RBD-15_S1-RBD-23
nb1.conc	nb2.conc	effect.rep1	effect.rep2
0.526667	0.325	163	293
0.526667	0.108333	265	92
0.526667	0.0361111	73	89
0.526667	0.012037	78	363
0.526667	0.00401235	91	95
0.526667	0.00133745	189	152
0.526667	0.000445816	80	61
0.526667	0.000148605	69	286
0.526667	4.95351e-05	94	83
0.526667	1.65117e-05	91	73
0.526667	5.5039e-06	349	202
0.526667	1.83463e-06	109	84
0.526667	0	339	41
0.175556	0.325	143	97
0.175556	0.108333	104	97
0.175556	0.0361111	116	1512
0.175556	0.012037	125	118
0.175556	0.00401235	113	101
0.175556	0.00133745	111	107
0.175556	0.000445816	73	73
0.175556	0.000148605	59	222
0.175556	4.95351e-05	77	90
0.175556	1.65117e-05	78	128
0.175556	5.5039e-06	101	78
0.175556	1.83463e-06	228	86
0.175556	0	36	38
0.0585185	0.325	201	87
0.0585185	0.108333	88	91
0.0585185	0.0361111	312	149
0.0585185	0.012037	89	111
0.0585185	0.00401235	624	286
0.0585185	0.00133745	109	107
0.0585185	0.000445816	95	71
0.0585185	0.000148605	84	66
0.0585185	4.95351e-05	150	86
0.0585185	1.65117e-05	88	99
0.0585185	5.5039e-06	197	109
0.0585185	1.83463e-06	92	82
0.0585185	0	40	27
0.0195062	0.325	537	95
0.0195062	0.108333	112	101
0.0195062	0.0361111	129	114
0.0195062	0.012037	127	111
0.0195062	0.00401235	211	132
0.0195062	0.00133745	426	104
0.0195062	0.000445816	285	67
0.0195062	0.000148605	491	72
0.0195062	4.95351e-05	212	549
0.0195062	1.65117e-05	89	118
0.0195062	5.5039e-06	93	111
0.0195062	1.83463e-06	106	357
0.0195062	0	222	205
0.00650206	0.325	119	88
0.00650206	0.108333	599	96
0.00650206	0.0361111	279	101
0.00650206	0.012037	423	87
0.00650206	0.00401235	133	88
0.00650206	0.00133745	110	468
0.00650206	0.000445816	1084	512
0.00650206	0.000148605	807	1044
0.00650206	4.95351e-05	89	97
0.00650206	1.65117e-05	89	272
0.00650206	5.5039e-06	195	134
0.00650206	1.83463e-06	526	95
0.00650206	0	2337	1474
0.00216735	0.325	0	309
0.00216735	0.108333	109	174
0.00216735	0.0361111	683	78
0.00216735	0.012037	97	101
0.00216735	0.00401235	131	991
0.00216735	0.00133745	118	998
0.00216735	0.000445816	443	1894
0.00216735	0.000148605	2505	1785
0.00216735	4.95351e-05	2543	1772
0.00216735	1.65117e-05	2002	2028
0.00216735	5.5039e-06	710	2042
0.00216735	1.83463e-06	3178	2158
0.00216735	0	2462	7276
0.000722451	0.325	905	559
0.000722451	0.108333	845	399
0.000722451	0.0361111	284	1651
0.000722451	0.012037	297	626
0.000722451	0.00401235	1387	2149
0.000722451	0.00133745	4339	4255
0.000722451	0.000445816	4846	6515
0.000722451	0.000148605	3868	5430
0.000722451	4.95351e-05	5857	6527
0.000722451	1.65117e-05	4839	3584
0.000722451	5.5039e-06	5878	1955
0.000722451	1.83463e-06	5425	6118
0.000722451	0	8455	6999
0.000240817	0.325	471	585
0.000240817	0.108333	1189	706
0.000240817	0.0361111	2362	399
0.000240817	0.012037	2565	677
0.000240817	0.00401235	4509	4583
0.000240817	0.00133745	5147	5564
0.000240817	0.000445816	4959	3938
0.000240817	0.000148605	6561	7629
0.000240817	4.95351e-05	4460	5468
0.000240817	1.65117e-05	6989	4882
0.000240817	5.5039e-06	9541	7236
0.000240817	1.83463e-06	9044	9872
0.000240817	0	8299	6549
8.02723e-05	0.325	1177	422
8.02723e-05	0.108333	511	909
8.02723e-05	0.0361111	1102	1032
8.02723e-05	0.012037	2788	2289
8.02723e-05	0.00401235	3854	5936
8.02723e-05	0.00133745	5858	7199
8.02723e-05	0.000445816	11500	6369
8.02723e-05	0.000148605	6401	8360
8.02723e-05	4.95351e-05	9227	7303
8.02723e-05	1.65117e-05	8464	6014
8.02723e-05	5.5039e-06	6961	6424
8.02723e-05	1.83463e-06	7712	5177
8.02723e-05	0	9995	4496
2.67574e-05	0.325	341	330
2.67574e-05	0.108333	1384	1350
2.67574e-05	0.0361111	1195	1063
2.67574e-05	0.012037	3457	3682
2.67574e-05	0.00401235	4737	2597
2.67574e-05	0.00133745	6569	7083
2.67574e-05	0.000445816	6976	6754
2.67574e-05	0.000148605	3663	5498
2.67574e-05	4.95351e-05	8763	6325
2.67574e-05	1.65117e-05	9859	6097
2.67574e-05	5.5039e-06	7101	8145
2.67574e-05	1.83463e-06	7003	6923
2.67574e-05	0	9627	5970
8.91915e-06	0.325	14	330
8.91915e-06	0.108333	8	7
8.91915e-06	0.0361111	933	15
8.91915e-06	0.012037	2184	7
8.91915e-06	0.00401235	2308	1039
8.91915e-06	0.00133745	5657	7
8.91915e-06	0.000445816	12312	3719
8.91915e-06	0.000148605	7450	6272
8.91915e-06	4.95351e-05	8467	9204
8.91915e-06	1.65117e-05	9369	9069
8.91915e-06	5.5039e-06	6319	7972
8.91915e-06	1.83463e-06	8431	8159
8.91915e-06	0	8364	6079
2.97305e-06	0.325	2059	153
2.97305e-06	0.108333	994	371
2.97305e-06	0.0361111	1049	883
2.97305e-06	0.012037	4206	3734
2.97305e-06	0.00401235	7698	3824
2.97305e-06	0.00133745	4820	5275
2.97305e-06	0.000445816	9030	6329
2.97305e-06	0.000148605	8351	6988
2.97305e-06	4.95351e-05	7691	5447
2.97305e-06	1.65117e-05	6009	7517
2.97305e-06	5.5039e-06	9629	7513
2.97305e-06	1.83463e-06	8537	8333
2.97305e-06	0	6407	11042
0	0.325	436	24
0	0.108333	727	269
0	0.0361111	496	351
0	0.012037	1634	2426
0	0.00401235	5191	7361
0	0.00133745	5560	7589
0	0.000445816	8399	5592
0	0.000148605	6878	5505
0	4.95351e-05	4967	6737
0	1.65117e-05	7316	6725
0	5.5039e-06	8183	7152
0	1.83463e-06	5398	7608
0	0	7882.33	7882.33

## Sheet: S1-23_S1-46
nb1.conc	nb2.conc	effect.rep1	effect.rep2
0.716667	1.33683	192	162
0.716667	0.445611	186	211
0.716667	0.148537	211	355
0.716667	0.0495123	407	254
0.716667	0.0165041	263	275
0.716667	0.00550137	290	321
0.716667	0.00183379	144	124
0.716667	0.000611264	143	135
0.716667	0.000203755	189	202
0.716667	6.79182e-05	311	166
0.716667	2.26394e-05	200	237
0.716667	7.54646e-06	235	252
0.716667	0	165	221
0.238889	1.33683	202	198
0.238889	0.445611	208	234
0.238889	0.148537	210	228
0.238889	0.0495123	231	221
0.238889	0.0165041	213	232
0.238889	0.00550137	369	466
0.238889	0.00183379	349	151
0.238889	0.000611264	343	233
0.238889	0.000203755	156	186
0.238889	6.79182e-05	177	218
0.238889	2.26394e-05	212	216
0.238889	7.54646e-06	194	204
0.238889	0	297	162
0.0796296	1.33683	399	190
0.0796296	0.445611	256	257
0.0796296	0.148537	287	187
0.0796296	0.0495123	252	209
0.0796296	0.0165041	329	184
0.0796296	0.00550137	356	656
0.0796296	0.00183379	616	308
0.0796296	0.000611264	463	291
0.0796296	0.000203755	310	334
0.0796296	6.79182e-05	169	198
0.0796296	2.26394e-05	205	336
0.0796296	7.54646e-06	456	802
0.0796296	0	334	639
0.0265432	1.33683	244	745
0.0265432	0.445611	239	242
0.0265432	0.148537	235	660
0.0265432	0.0495123	966	739
0.0265432	0.0165041	362	696
0.0265432	0.00550137	560	1328
0.0265432	0.00183379	945	1106
0.0265432	0.000611264	673	214
0.0265432	0.000203755	353	965
0.0265432	6.79182e-05	659	489
0.0265432	2.26394e-05	572	219
0.0265432	7.54646e-06	805	641
0.0265432	0	1565	1185
0.00884774	1.33683	559	244
0.00884774	0.445611	167	187
0.00884774	0.148537	814	574
0.00884774	0.0495123	616	586
0.00884774	0.0165041	668	1332
0.00884774	0.00550137	1148	1150
0.00884774	0.00183379	636	1414
0.00884774	0.000611264	1452	1197
0.00884774	0.000203755	1140	984
0.00884774	6.79182e-05	1263	746
0.00884774	2.26394e-05	1173	1476
0.00884774	7.54646e-06	1447	2178
0.00884774	0	4221	2136
0.00294925	1.33683	0	191
0.00294925	0.445611	593	490
0.00294925	0.148537	419	629
0.00294925	0.0495123	589	1480
0.00294925	0.0165041	1121	2216
0.00294925	0.00550137	1419	3115
0.00294925	0.00183379	4219	2201
0.00294925	0.000611264	2787	2407
0.00294925	0.000203755	2974	3131
0.00294925	6.79182e-05	2002	2959
0.00294925	2.26394e-05	2923	3619
0.00294925	7.54646e-06	3908	4148
0.00294925	0	3596	14576
0.000983082	1.33683	516	398
0.000983082	0.445611	1302	858
0.000983082	0.148537	1321	2338
0.000983082	0.0495123	5695	4260
0.000983082	0.0165041	7043	7396
0.000983082	0.00550137	7557	6668
0.000983082	0.00183379	10687	9330
0.000983082	0.000611264	8907	9597
0.000983082	0.000203755	7966	7373
0.000983082	6.79182e-05	8496	8769
0.000983082	2.26394e-05	10432	9755
0.000983082	7.54646e-06	9156	18444
0.000983082	0	17851	10593
0.000327694	1.33683	2933	1063
0.000327694	0.445611	5204	2737
0.000327694	0.148537	8203	9108
0.000327694	0.0495123	9529	9863
0.000327694	0.0165041	13513	14233
0.000327694	0.00550137	13991	19107
0.000327694	0.00183379	33957	18138
0.000327694	0.000611264	17669	22733
0.000327694	0.000203755	20520	28169
0.000327694	6.79182e-05	23903	22830
0.000327694	2.26394e-05	25814	25063
0.000327694	7.54646e-06	32584	20915.4
0.000327694	0	13768	12102
0.000109231	1.33683	2104	1633
0.000109231	0.445611	3967	6968
0.000109231	0.148537	12469	13901
0.000109231	0.0495123	16830	14689
0.000109231	0.0165041	15988	22486
0.000109231	0.00550137	20634	20915.4
0.000109231	0.00183379	19913	10472
0.000109231	0.000611264	13233	11380
0.000109231	0.000203755	9477	13266
0.000109231	6.79182e-05	11051	9548
0.000109231	2.26394e-05	10389	10119
0.000109231	7.54646e-06	16039	13625
0.000109231	0	12443	10405
3.64104e-05	1.33683	1898	1275
3.64104e-05	0.445611	3758	3958
3.64104e-05	0.148537	8795	8435
3.64104e-05	0.0495123	7095	7403
3.64104e-05	0.0165041	10727	16941
3.64104e-05	0.00550137	28523	22390
3.64104e-05	0.00183379	17720	10094
3.64104e-05	0.000611264	11227	10552
3.64104e-05	0.000203755	14087	9344
3.64104e-05	6.79182e-05	11954	11195
3.64104e-05	2.26394e-05	11472	8130
3.64104e-05	7.54646e-06	9831	9888
3.64104e-05	0	8320	12379
1.21368e-05	1.33683	1254	1275
1.21368e-05	0.445611	3309	1671
1.21368e-05	0.148537	6002	4267
1.21368e-05	0.0495123	11494	7080
1.21368e-05	0.0165041	9059	9988
1.21368e-05	0.00550137	5996	10567
1.21368e-05	0.00183379	15620	15331
1.21368e-05	0.000611264	11531	12101
1.21368e-05	0.000203755	15627	9742
1.21368e-05	6.79182e-05	10067	12118
1.21368e-05	2.26394e-05	13337	12653
1.21368e-05	7.54646e-06	12176	11653
1.21368e-05	0	10561	14672
4.0456e-06	1.33683	2770	2387
4.0456e-06	0.445611	3743	4744
4.0456e-06	0.148537	3593	6909
4.0456e-06	0.0495123	10611	9528
4.0456e-06	0.0165041	11897	8427
4.0456e-06	0.00550137	11417	17932
4.0456e-06	0.00183379	8843	9490
4.0456e-06	0.000611264	11540	10251
4.0456e-06	0.000203755	11514	10004
4.0456e-06	6.79182e-05	8947	9594
4.0456e-06	2.26394e-05	8048	12873
4.0456e-06	7.54646e-06	10607	12139
4.0456e-06	0	13334	12126
0	1.33683	1699	2387
0	0.445611	4515	6145
0	0.148537	8627	7595
0	0.0495123	11278	14606
0	0.0165041	13271	11269
0	0.00550137	10966	18368
0	0.00183379	21108	11639
0	0.000611264	11230	10838
0	0.000203755	11230	10838
0	6.79182e-05	12616	10787
0	2.26394e-05	13652	8425
0	7.54646e-06	12952	12643
0	0	20915.4	20915.4

## Sheet: S1-RBD-15_S1-46
nb1.conc	nb2.conc	effect.rep1	effect.rep2
7.03817	1.33683	151	134
7.03817	0.445611	115	123
7.03817	0.148537	118	178
7.03817	0.0495123	140	135
7.03817	0.0165041	197	136
7.03817	0.00550137	146	226
7.03817	0.00183379	121	88
7.03817	0.000611264	89	81
7.03817	0.000203755	152	145
7.03817	6.79182e-05	143	126
7.03817	2.26394e-05	137	112
7.03817	7.54646e-06	119	99
7.03817	0	50	50
2.34606	1.33683	247	104
2.34606	0.445611	135	130
2.34606	0.148537	138	147
2.34606	0.0495123	153	142
2.34606	0.0165041	152	142
2.34606	0.00550137	209	141
2.34606	0.00183379	93	112
2.34606	0.000611264	100	95
2.34606	0.000203755	91	109
2.34606	6.79182e-05	134	131
2.34606	2.26394e-05	114	122
2.34606	7.54646e-06	128	99
2.34606	0	64	57
0.782019	1.33683	316	111
0.782019	0.445611	144	117
0.782019	0.148537	130	160
0.782019	0.0495123	126	131
0.782019	0.0165041	124	136
0.782019	0.00550137	153	122
0.782019	0.00183379	124	75
0.782019	0.000611264	96	95
0.782019	0.000203755	114	111
0.782019	6.79182e-05	224	133
0.782019	2.26394e-05	104	86
0.782019	7.54646e-06	113	141
0.782019	0	92	114
0.260673	1.33683	345	121
0.260673	0.445611	130	149
0.260673	0.148537	166	150
0.260673	0.0495123	176	400
0.260673	0.0165041	190	146
0.260673	0.00550137	188	283
0.260673	0.00183379	109	260
0.260673	0.000611264	127	156
0.260673	0.000203755	133	114
0.260673	6.79182e-05	279	176
0.260673	2.26394e-05	124	116
0.260673	7.54646e-06	156	397
0.260673	0	39	160
0.0868909	1.33683	171	123
0.0868909	0.445611	119	146
0.0868909	0.148537	312	142
0.0868909	0.0495123	320	136
0.0868909	0.0165041	153	111
0.0868909	0.00550137	152	148
0.0868909	0.00183379	216	63
0.0868909	0.000611264	159	370
0.0868909	0.000203755	184	158
0.0868909	6.79182e-05	179	181
0.0868909	2.26394e-05	432	189
0.0868909	7.54646e-06	249	311
0.0868909	0	202	688
0.0289636	1.33683	0	130
0.0289636	0.445611	151	165
0.0289636	0.148537	128	361
0.0289636	0.0495123	253	161
0.0289636	0.0165041	521	311
0.0289636	0.00550137	425	168
0.0289636	0.00183379	480	377
0.0289636	0.000611264	381	408
0.0289636	0.000203755	201	549
0.0289636	6.79182e-05	461	385
0.0289636	2.26394e-05	1155	994
0.0289636	7.54646e-06	391	722
0.0289636	0	403	2571
0.00965455	1.33683	182	363
0.00965455	0.445611	142	176
0.00965455	0.148537	680	307
0.00965455	0.0495123	666	713
0.00965455	0.0165041	964	1090
0.00965455	0.00550137	1759	1268
0.00965455	0.00183379	1883	2138
0.00965455	0.000611264	1102	904
0.00965455	0.000203755	953	1130
0.00965455	6.79182e-05	#REF!	904
0.00965455	2.26394e-05	1178	1989
0.00965455	7.54646e-06	1113	1662
0.00965455	0	5272	3464
0.00321818	1.33683	1702	490
0.00321818	0.445611	582	1301
0.00321818	0.148537	3832	2537
0.00321818	0.0495123	3881	4276
0.00321818	0.0165041	5112	6589
0.00321818	0.00550137	4865	6186
0.00321818	0.00183379	10041	6215
0.00321818	0.000611264	10744	8273
0.00321818	0.000203755	7001	7789
0.00321818	6.79182e-05	7589	8501
0.00321818	2.26394e-05	6742	5370
0.00321818	7.54646e-06	8989	12269
0.00321818	0	6283	9082
0.00107273	1.33683	2533	1618
0.00107273	0.445611	3529	3138
0.00107273	0.148537	7827	5444
0.00107273	0.0495123	7266	8516
0.00107273	0.0165041	10704	8148
0.00107273	0.00550137	11118	13293
0.00107273	0.00183379	16761	10660
0.00107273	0.000611264	8693	9072
0.00107273	0.000203755	10080	13784
0.00107273	6.79182e-05	11258	8632
0.00107273	2.26394e-05	9428	9184
0.00107273	7.54646e-06	10251	7986
0.00107273	0	6831	8415
0.000357576	1.33683	1130	1373
0.000357576	0.445611	3896	3096
0.000357576	0.148537	5923	7849
0.000357576	0.0495123	10708	8219
0.000357576	0.0165041	9673	8282
0.000357576	0.00550137	10950	7810
0.000357576	0.00183379	11368	8631
0.000357576	0.000611264	10453	9141
0.000357576	0.000203755	7417	6435
0.000357576	6.79182e-05	8047	9459
0.000357576	2.26394e-05	6980	5984
0.000357576	7.54646e-06	16114	9467
0.000357576	0	6765	7903
0.000119192	1.33683	1628	1373
0.000119192	0.445611	4627	2623
0.000119192	0.148537	3869	3716
0.000119192	0.0495123	8918	5176
0.000119192	0.0165041	5431	6478
0.000119192	0.00550137	7180	9389
0.000119192	0.00183379	8272	8311
0.000119192	0.000611264	8263	8875
0.000119192	0.000203755	10030	6918
0.000119192	6.79182e-05	8049	8507
0.000119192	2.26394e-05	6356	8929
0.000119192	7.54646e-06	6754	8508
0.000119192	0	8356	7896
3.97307e-05	1.33683	1774	1275
3.97307e-05	0.445611	5501	4293
3.97307e-05	0.148537	7950	5604
3.97307e-05	0.0495123	6124	8330
3.97307e-05	0.0165041	4696	6400
3.97307e-05	0.00550137	6587	11209
3.97307e-05	0.00183379	14075.1	10070
3.97307e-05	0.000611264	11617	14075.1
3.97307e-05	0.000203755	13148	13050
3.97307e-05	6.79182e-05	14204	15350
3.97307e-05	2.26394e-05	17621	13832
3.97307e-05	7.54646e-06	13872	16318
3.97307e-05	0	21368	11576
0	1.33683	1328	1967
0	0.445611	4528	3900
0	0.148537	6899	7358
0	0.0495123	8225	8162
0	0.0165041	7010	6925
0	0.00550137	10214	9514
0	0.00183379	12610	7730
0	0.000611264	7490	8395
0	0.000203755	6204	8590
0	6.79182e-05	6876	8025
0	2.26394e-05	7852	8424
0	7.54646e-06	8111	9383
0	0	14075.1	14075.1

## Sheet: S1-49_S1-1
nb1.conc	nb2.conc	effect.rep1	effect.rep2
0.366667	0.386667	221	312
0.366667	0.128889	228	262
0.366667	0.042963	259	435
0.366667	0.014321	289	239
0.366667	0.00477366	246	263
0.366667	0.00159122	271	375
0.366667	0.000530407	370	328
0.366667	0.000176802	1160	1087
0.366667	5.89341e-05	2586	3099
0.366667	1.96447e-05	2232	3238
0.366667	6.54823e-06	3292	2016
0.366667	2.18274e-06	3217	2655
0.366667	0	6020	7313
0.122222	0.386667	369	469
0.122222	0.128889	369	397
0.122222	0.042963	451	405
0.122222	0.014321	551	388
0.122222	0.00477366	376	432
0.122222	0.00159122	893	1461
0.122222	0.000530407	984	285
0.122222	0.000176802	3767	3362
0.122222	5.89341e-05	5140	7613
0.122222	1.96447e-05	5599	6675
0.122222	6.54823e-06	4165	5501
0.122222	2.18274e-06	4510	6326
0.122222	0	21745	17739
0.0407407	0.386667	363	702
0.0407407	0.128889	332	338
0.0407407	0.042963	473	390
0.0407407	0.014321	474	461
0.0407407	0.00477366	351	576
0.0407407	0.00159122	2963	4065
0.0407407	0.000530407	6920	5932
0.0407407	0.000176802	11580	11348
0.0407407	5.89341e-05	15576	18486
0.0407407	1.96447e-05	14609	13320
0.0407407	6.54823e-06	12533	15113
0.0407407	2.18274e-06	15855	16882
0.0407407	0	37772	36661
0.0135802	0.386667	384	342
0.0135802	0.128889	502	358
0.0135802	0.042963	416	458
0.0135802	0.014321	1162	396
0.0135802	0.00477366	2562	3174
0.0135802	0.00159122	7081	10270
0.0135802	0.000530407	12742	14148
0.0135802	0.000176802	25726	30291
0.0135802	5.89341e-05	27862	24064
0.0135802	1.96447e-05	25848	28630
0.0135802	6.54823e-06	33114	23257
0.0135802	2.18274e-06	19494	34595
0.0135802	0	49520	41560
0.00452675	0.386667	411	371
0.00452675	0.128889	543	532
0.00452675	0.042963	521	586
0.00452675	0.014321	811	609
0.00452675	0.00477366	3573	5685
0.00452675	0.00159122	11159	11576
0.00452675	0.000530407	33592	24723
0.00452675	0.000176802	35223	31441
0.00452675	5.89341e-05	30277	37277
0.00452675	1.96447e-05	42990	40151
0.00452675	6.54823e-06	43959	45400
0.00452675	2.18274e-06	37503	46408
0.00452675	0	48261	50610
0.00150892	0.386667	0	352
0.00150892	0.128889	380	421
0.00150892	0.042963	429	460
0.00150892	0.014321	457	848
0.00150892	0.00477366	546	1014
0.00150892	0.00159122	1462	13607
0.00150892	0.000530407	8868	30799
0.00150892	0.000176802	26258	40094
0.00150892	5.89341e-05	41955	41416
0.00150892	1.96447e-05	37278	37949
0.00150892	6.54823e-06	47014	39208
0.00150892	2.18274e-06	38608	61917
0.00150892	0	42967	62830
0.000502972	0.386667	450	734
0.000502972	0.128889	397	465
0.000502972	0.042963	817	512
0.000502972	0.014321	536	420
0.000502972	0.00477366	3446	2390
0.000502972	0.00159122	13683	12895
0.000502972	0.000530407	40281	31544
0.000502972	0.000176802	32682	50161
0.000502972	5.89341e-05	48598	41709
0.000502972	1.96447e-05	44818	50761
0.000502972	6.54823e-06	50719	45097
0.000502972	2.18274e-06	42912	47841
0.000502972	0	60072	57529
0.000167657	0.386667	447	351
0.000167657	0.128889	625	420
0.000167657	0.042963	438	461
0.000167657	0.014321	1355	628
0.000167657	0.00477366	6642	6814
0.000167657	0.00159122	20331	26255
0.000167657	0.000530407	47399	50957
0.000167657	0.000176802	52311	54998
0.000167657	5.89341e-05	66233	52865
0.000167657	1.96447e-05	57120	55747
0.000167657	6.54823e-06	57342	55097
0.000167657	2.18274e-06	60886	59888
0.000167657	0	49505	50987
5.58858e-05	0.386667	100	75
5.58858e-05	0.128889	83	180
5.58858e-05	0.042963	92	91
5.58858e-05	0.014321	459	678
5.58858e-05	0.00477366	2887	4943
5.58858e-05	0.00159122	11888	21242
5.58858e-05	0.000530407	51317	42507
5.58858e-05	0.000176802	56442	62703
5.58858e-05	5.89341e-05	61153	62408
5.58858e-05	1.96447e-05	61558	65769
5.58858e-05	6.54823e-06	55978	62581
5.58858e-05	2.18274e-06	55642	69066
5.58858e-05	0	53720	51026
1.86286e-05	0.386667	125	114
1.86286e-05	0.128889	292	138
1.86286e-05	0.042963	112	105
1.86286e-05	0.014321	642	243
1.86286e-05	0.00477366	6372	3010
1.86286e-05	0.00159122	22738	22011
1.86286e-05	0.000530407	58266	46589
1.86286e-05	0.000176802	40032	50759
1.86286e-05	5.89341e-05	50238	48549
1.86286e-05	1.96447e-05	55084	45404
1.86286e-05	6.54823e-06	35194	66802
1.86286e-05	2.18274e-06	57354	56615
1.86286e-05	0	54258	48968
6.20953e-06	0.386667	138	114
6.20953e-06	0.128889	323	222
6.20953e-06	0.042963	148	109
6.20953e-06	0.014321	770	187
6.20953e-06	0.00477366	2054	141
6.20953e-06	0.00159122	18976	3830
6.20953e-06	0.000530407	47428	19572
6.20953e-06	0.000176802	48378	45615
6.20953e-06	5.89341e-05	50498	51346
6.20953e-06	1.96447e-05	49872	49882
6.20953e-06	6.54823e-06	43121	45870
6.20953e-06	2.18274e-06	49475	58187
6.20953e-06	0	47134	52560
2.06984e-06	0.386667	162	429
2.06984e-06	0.128889	206	236
2.06984e-06	0.042963	233	224
2.06984e-06	0.014321	193	188
2.06984e-06	0.00477366	1806	3766
2.06984e-06	0.00159122	11901	12869
2.06984e-06	0.000530407	38123	30809
2.06984e-06	0.000176802	54650	43473
2.06984e-06	5.89341e-05	57012	56905
2.06984e-06	1.96447e-05	49431	51730
2.06984e-06	6.54823e-06	54113	54079
2.06984e-06	2.18274e-06	50543	48074
2.06984e-06	0	52323	49533
0	0.386667	239	355
0	0.128889	262	644
0	0.042963	270	346
0	0.014321	367	276
0	0.00477366	4274	4622
0	0.00159122	10639	12503
0	0.000530407	42472	37478
0	0.000176802	47739	41912
0	5.89341e-05	51192	44365
0	1.96447e-05	55506	50623
0	6.54823e-06	50011	48550
0	2.18274e-06	46337	44477
0	0	54750.2	54750.2

## Sheet: S1-49_S1-RBD-15
nb1.conc	nb2.conc	effect.rep1	effect.rep2
0.366667	0.526667	72	60
0.366667	0.175556	73	154
0.366667	0.0585185	174	136
0.366667	0.0195062	145	159
0.366667	0.00650206	148	122
0.366667	0.00216735	145	337
0.366667	0.000722451	293	481
0.366667	0.000240817	543	853
0.366667	8.02723e-05	2480	1765
0.366667	2.67574e-05	2860	3159
0.366667	8.91915e-06	2120	2590
0.366667	2.97305e-06	2207	6341
0.366667	0	12542	12014
0.122222	0.526667	94	45
0.122222	0.175556	159	348
0.122222	0.0585185	270	193
0.122222	0.0195062	204	261
0.122222	0.00650206	232	191
0.122222	0.00216735	419	299
0.122222	0.000722451	245	255
0.122222	0.000240817	1266	802
0.122222	8.02723e-05	5655	3916
0.122222	2.67574e-05	3972	9631
0.122222	8.91915e-06	8453	7809
0.122222	2.97305e-06	9033	9415
0.122222	0	26758	29428
0.0407407	0.526667	63	72
0.0407407	0.175556	134	124
0.0407407	0.0585185	211	188
0.0407407	0.0195062	324	187
0.0407407	0.00650206	213	550
0.0407407	0.00216735	326	724
0.0407407	0.000722451	1785	1380
0.0407407	0.000240817	7690	4551
0.0407407	8.02723e-05	13042	15890
0.0407407	2.67574e-05	16969	17554
0.0407407	8.91915e-06	19264	15607
0.0407407	2.97305e-06	20820	35111
0.0407407	0	38522	33571
0.0135802	0.526667	77	61
0.0135802	0.175556	102	117
0.0135802	0.0585185	188	185
0.0135802	0.0195062	363	221
0.0135802	0.00650206	480	223
0.0135802	0.00216735	405	1833
0.0135802	0.000722451	2906	1662
0.0135802	0.000240817	8378	12012
0.0135802	8.02723e-05	23970	27655
0.0135802	2.67574e-05	23475	20048
0.0135802	8.91915e-06	27032	26123
0.0135802	2.97305e-06	24447	39940
0.0135802	0	29536	35190
0.00452675	0.526667	239	232
0.00452675	0.175556	290	359
0.00452675	0.0585185	358	385
0.00452675	0.0195062	387	404
0.00452675	0.00650206	387	642
0.00452675	0.00216735	481	1404
0.00452675	0.000722451	4581	2208
0.00452675	0.000240817	15638	16461
0.00452675	8.02723e-05	32262	35409
0.00452675	2.67574e-05	34217	31362
0.00452675	8.91915e-06	30034	26252
0.00452675	2.97305e-06	25925	46995
0.00452675	0	34752	32285
0.00150892	0.526667	0	185
0.00150892	0.175556	219	153
0.00150892	0.0585185	170	164
0.00150892	0.0195062	166	165
0.00150892	0.00650206	263	301
0.00150892	0.00216735	245	489
0.00150892	0.000722451	293	1172
0.00150892	0.000240817	469	945
0.00150892	8.02723e-05	1447	4165
0.00150892	2.67574e-05	6385	14145
0.00150892	8.91915e-06	14534	29316
0.00150892	2.97305e-06	24919	41799
0.00150892	0	29455	53184
0.000502972	0.526667	73	86
0.000502972	0.175556	133	124
0.000502972	0.0585185	169	153
0.000502972	0.0195062	229	174
0.000502972	0.00650206	236	252
0.000502972	0.00216735	1075	1446
0.000502972	0.000722451	4112	3041
0.000502972	0.000240817	13269	18303
0.000502972	8.02723e-05	30591	33063
0.000502972	2.67574e-05	32046	28729
0.000502972	8.91915e-06	38352	34547
0.000502972	2.97305e-06	34317	56276
0.000502972	0	65014	43783
0.000167657	0.526667	408	161
0.000167657	0.175556	202	282
0.000167657	0.0585185	305	371
0.000167657	0.0195062	316	277
0.000167657	0.00650206	314	421
0.000167657	0.00216735	293	510
0.000167657	0.000722451	8160	5284
0.000167657	0.000240817	27494	34611
0.000167657	8.02723e-05	57549	56450
0.000167657	2.67574e-05	58763	41657
0.000167657	8.91915e-06	52364	39588
0.000167657	2.97305e-06	64015	89174
0.000167657	0	37059	31274
5.58858e-05	0.526667	49	50
5.58858e-05	0.175556	63	76
5.58858e-05	0.0585185	141	74
5.58858e-05	0.0195062	1006	83
5.58858e-05	0.00650206	332	139
5.58858e-05	0.00216735	1882	883
5.58858e-05	0.000722451	6803	1429
5.58858e-05	0.000240817	13209	13435
5.58858e-05	8.02723e-05	39436	34894
5.58858e-05	2.67574e-05	32432	38280
5.58858e-05	8.91915e-06	42325	36212
5.58858e-05	2.97305e-06	41263	49677
5.58858e-05	0	26982	28533
1.86286e-05	0.526667	55	70
1.86286e-05	0.175556	69	70
1.86286e-05	0.0585185	103	126
1.86286e-05	0.0195062	130	122
1.86286e-05	0.00650206	225	108
1.86286e-05	0.00216735	805	1047
1.86286e-05	0.000722451	10099	5071
1.86286e-05	0.000240817	20707	20019
1.86286e-05	8.02723e-05	43406	23977
1.86286e-05	2.67574e-05	28693	33501
1.86286e-05	8.91915e-06	38642	36783
1.86286e-05	2.97305e-06	30490	37145
1.86286e-05	0	28316	28581
6.20953e-06	0.526667	50	70
6.20953e-06	0.175556	97	68
6.20953e-06	0.0585185	123	181
6.20953e-06	0.0195062	293	117
6.20953e-06	0.00650206	197	653
6.20953e-06	0.00216735	611	645
6.20953e-06	0.000722451	5805	1172
6.20953e-06	0.000240817	16089	3285
6.20953e-06	8.02723e-05	26393	15020
6.20953e-06	2.67574e-05	30058	25266
6.20953e-06	8.91915e-06	31196	22692
6.20953e-06	2.97305e-06	28476	35002
6.20953e-06	0	29112	40287
2.06984e-06	0.526667	62	224
2.06984e-06	0.175556	97	137
2.06984e-06	0.0585185	200	185
2.06984e-06	0.0195062	201	175
2.06984e-06	0.00650206	183	355
2.06984e-06	0.00216735	586	1769
2.06984e-06	0.000722451	4168	2540
2.06984e-06	0.000240817	13984	15872
2.06984e-06	8.02723e-05	27930	26138
2.06984e-06	2.67574e-05	31630	27129
2.06984e-06	8.91915e-06	30641	31172
2.06984e-06	2.97305e-06	31867	35359
2.06984e-06	0	36001	43020
0	0.526667	106	97
0	0.175556	108	137
0	0.0585185	186	167
0	0.0195062	317	615
0	0.00650206	542	195
0	0.00216735	467	424
0	0.000722451	617	649
0	0.000240817	1517	2779
0	8.02723e-05	7349	6791
0	2.67574e-05	28227	17325
0	8.91915e-06	31413	29695
0	2.97305e-06	29878	34237
0	0	56637.1	56637.1

## Sheet: S1-23_S2-10-dimer
nb1.conc	nb2.conc	effect.rep1	effect.rep2
0.716667	0.896667	276	260
0.716667	0.298889	244	226
0.716667	0.0996296	211	320
0.716667	0.0332099	322	300
0.716667	0.01107	354	292
0.716667	0.00368999	156	236
0.716667	0.00123	363	267
0.716667	0.000409998	222	244
0.716667	0.000136666	269	375
0.716667	4.55554e-05	379	330
0.716667	1.51851e-05	403	264
0.716667	5.06171e-06	221	294
0.716667	0	159	124
0.238889	0.896667	371	279
0.238889	0.298889	220	156
0.238889	0.0996296	213	326
0.238889	0.0332099	348	287
0.238889	0.01107	343	363
0.238889	0.00368999	285	365
0.238889	0.00123	343	311
0.238889	0.000409998	302	210
0.238889	0.000136666	249	821
0.238889	4.55554e-05	367	370
0.238889	1.51851e-05	913	372
0.238889	5.06171e-06	247	402
0.238889	0	139	952
0.0796296	0.896667	333	321
0.0796296	0.298889	272	272
0.0796296	0.0996296	313	348
0.0796296	0.0332099	334	377
0.0796296	0.01107	454	686
0.0796296	0.00368999	556	343
0.0796296	0.00123	359	301
0.0796296	0.000409998	857	265
0.0796296	0.000136666	669	486
0.0796296	4.55554e-05	648	339
0.0796296	1.51851e-05	458	482
0.0796296	5.06171e-06	696	466
0.0796296	0	121	311
0.0265432	0.896667	303	269
0.0265432	0.298889	226	239
0.0265432	0.0996296	312	543
0.0265432	0.0332099	534	325
0.0265432	0.01107	422	375
0.0265432	0.00368999	1023	904
0.0265432	0.00123	791	728
0.0265432	0.000409998	381	944
0.0265432	0.000136666	420	599
0.0265432	4.55554e-05	674	678
0.0265432	1.51851e-05	706	923
0.0265432	5.06171e-06	341	865
0.0265432	0	1103	1832
0.00884774	0.896667	631	252
0.00884774	0.298889	196	278
0.00884774	0.0996296	466	495
0.00884774	0.0332099	970	752
0.00884774	0.01107	665	1075
0.00884774	0.00368999	1917	2538
0.00884774	0.00123	1530	1942
0.00884774	0.000409998	3227	1435
0.00884774	0.000136666	1299	2591
0.00884774	4.55554e-05	1617	1948
0.00884774	1.51851e-05	2181	2540
0.00884774	5.06171e-06	2845	2642
0.00884774	0	6406	4649
0.00294925	0.896667	0	1308
0.00294925	0.298889	1322	2609
0.00294925	0.0996296	1899	3282
0.00294925	0.0332099	2432	5400
0.00294925	0.01107	3806	5982
0.00294925	0.00368999	6272	5119
0.00294925	0.00123	3409	5601
0.00294925	0.000409998	8750	6164
0.00294925	0.000136666	5148	8018
0.00294925	4.55554e-05	6774	8458
0.00294925	1.51851e-05	6393	9786
0.00294925	5.06171e-06	8072	15000
0.00294925	0	6494	34453
0.000983082	0.896667	10766	4184
0.000983082	0.298889	10847	9028
0.000983082	0.0996296	14202	16628
0.000983082	0.0332099	17313	17846
0.000983082	0.01107	20606	23054
0.000983082	0.00368999	23009	32321
0.000983082	0.00123	28288	24021
0.000983082	0.000409998	27449	32179
0.000983082	0.000136666	23939	36930
0.000983082	4.55554e-05	34675	31023
0.000983082	1.51851e-05	35311	28967
0.000983082	5.06171e-06	32343	42227
0.000983082	0	57293	33292
0.000327694	0.896667	22344	14533
0.000327694	0.298889	16490	20197
0.000327694	0.0996296	12359	16804
0.000327694	0.0332099	24555	36490
0.000327694	0.01107	41818	36386
0.000327694	0.00368999	36209	49783
0.000327694	0.00123	80559	71442
0.000327694	0.000409998	62088	66059
0.000327694	0.000136666	67011	69260
0.000327694	4.55554e-05	56125	63383
0.000327694	1.51851e-05	68840	57892
0.000327694	5.06171e-06	60371	84679
0.000327694	0	43960	38284
0.000109231	0.896667	14834	14929
0.000109231	0.298889	24890	21628
0.000109231	0.0996296	18151	29595
0.000109231	0.0332099	36716	35464
0.000109231	0.01107	35666	11200
0.000109231	0.00368999	17128	15886
0.000109231	0.00123	58512	36596
0.000109231	0.000409998	9873	15985
0.000109231	0.000136666	25512	38608
0.000109231	4.55554e-05	36767	33316
0.000109231	1.51851e-05	37946	32123
0.000109231	5.06171e-06	12576	34487
0.000109231	0	31210	35723
3.64104e-05	0.896667	18792	11319
3.64104e-05	0.298889	7760	7024
3.64104e-05	0.0996296	8372	20893
3.64104e-05	0.0332099	12431	25451
3.64104e-05	0.01107	31010	31040
3.64104e-05	0.00368999	2769	56022
3.64104e-05	0.00123	54002	24878
3.64104e-05	0.000409998	35725	5526
3.64104e-05	0.000136666	17069	31725
3.64104e-05	4.55554e-05	32814	28709
3.64104e-05	1.51851e-05	24333	35835
3.64104e-05	5.06171e-06	15070	39795
3.64104e-05	0	36847	36486
1.21368e-05	0.896667	13516	11319
1.21368e-05	0.298889	16406	11018
1.21368e-05	0.0996296	22599	18150
1.21368e-05	0.0332099	28264	23280
1.21368e-05	0.01107	40994	22657
1.21368e-05	0.00368999	15924	36615
1.21368e-05	0.00123	49821	53113
1.21368e-05	0.000409998	33372	43871
1.21368e-05	0.000136666	28135	32258
1.21368e-05	4.55554e-05	9768	24659
1.21368e-05	1.51851e-05	29644	32515
1.21368e-05	5.06171e-06	31070	24894
1.21368e-05	0	39175	34151
4.0456e-06	0.896667	8898	3377
4.0456e-06	0.298889	4902	7006
4.0456e-06	0.0996296	11886	8615
4.0456e-06	0.0332099	11119	22962
4.0456e-06	0.01107	28178	36089
4.0456e-06	0.00368999	4850	43208
4.0456e-06	0.00123	46286	32534
4.0456e-06	0.000409998	25360	27540
4.0456e-06	0.000136666	30820	27814
4.0456e-06	4.55554e-05	30265	31336
4.0456e-06	1.51851e-05	34098	34395
4.0456e-06	5.06171e-06	18033	38084
4.0456e-06	0	39893	37421
0	0.896667	15612	3377
0	0.298889	22679	17973
0	0.0996296	21672	14876
0	0.0332099	20632	20824
0	0.01107	34907	39954
0	0.00368999	28886	51243
0	0.00123	69804	37776
0	0.000409998	45551	40944
0	0.000136666	31581	39228
0	4.55554e-05	39994	42361
0	1.51851e-05	48773	39824
0	5.06171e-06	36877	42598
0	0	69744.2	69744.2

## Sheet: S1-RBD-15_S2-10-dimer
nb1.conc	nb2.conc	effect.rep1	effect.rep2
0.526667	0.896667	200	179
0.526667	0.298889	136	181
0.526667	0.0996296	186	177
0.526667	0.0332099	214	199
0.526667	0.01107	346	152
0.526667	0.00368999	154	183
0.526667	0.00123	315	232
0.526667	0.000409998	252	460
0.526667	0.000136666	290	420
0.526667	4.55554e-05	236	212
0.526667	1.51851e-05	215	196
0.526667	5.06171e-06	200	286
0.526667	0	146	124
0.175556	0.896667	323	287
0.175556	0.298889	314	388
0.175556	0.0996296	350	513
0.175556	0.0332099	266	301
0.175556	0.01107	246	320
0.175556	0.00368999	225	283
0.175556	0.00123	369	331
0.175556	0.000409998	379	305
0.175556	0.000136666	344	308
0.175556	4.55554e-05	321	315
0.175556	1.51851e-05	255	237
0.175556	5.06171e-06	241	295
0.175556	0	93	108
0.0585185	0.896667	355	343
0.0585185	0.298889	615	282
0.0585185	0.0996296	297	317
0.0585185	0.0332099	301	282
0.0585185	0.01107	277	243
0.0585185	0.00368999	199	312
0.0585185	0.00123	440	330
0.0585185	0.000409998	309	266
0.0585185	0.000136666	334	271
0.0585185	4.55554e-05	280	253
0.0585185	1.51851e-05	255	243
0.0585185	5.06171e-06	287	482
0.0585185	0	120	103
0.0195062	0.896667	381	359
0.0195062	0.298889	337	287
0.0195062	0.0996296	331	361
0.0195062	0.0332099	266	258
0.0195062	0.01107	292	225
0.0195062	0.00368999	275	332
0.0195062	0.00123	389	247
0.0195062	0.000409998	290	303
0.0195062	0.000136666	277	497
0.0195062	4.55554e-05	216	195
0.0195062	1.51851e-05	208	271
0.0195062	5.06171e-06	201	181
0.0195062	0	109	80
0.00650206	0.896667	260	227
0.00650206	0.298889	172	238
0.00650206	0.0996296	209	194
0.00650206	0.0332099	161	174
0.00650206	0.01107	174	146
0.00650206	0.00368999	197	147
0.00650206	0.00123	175	128
0.00650206	0.000409998	207	216
0.00650206	0.000136666	260	420
0.00650206	4.55554e-05	221	584
0.00650206	1.51851e-05	362	203
0.00650206	5.06171e-06	246	215
0.00650206	0	734	272
0.00216735	0.896667	0	211
0.00216735	0.298889	281	253
0.00216735	0.0996296	203	298
0.00216735	0.0332099	267	265
0.00216735	0.01107	367	231
0.00216735	0.00368999	245	350
0.00216735	0.00123	387	248
0.00216735	0.000409998	299	237
0.00216735	0.000136666	493	368
0.00216735	4.55554e-05	223	226
0.00216735	1.51851e-05	339	195
0.00216735	5.06171e-06	418	184
0.00216735	0	256	357
0.000722451	0.896667	261	198
0.000722451	0.298889	165	180
0.000722451	0.0996296	205	154
0.000722451	0.0332099	249	410
0.000722451	0.01107	429	183
0.000722451	0.00368999	744	559
0.000722451	0.00123	603	108
0.000722451	0.000409998	939	402
0.000722451	0.000136666	158	671
0.000722451	4.55554e-05	172	215
0.000722451	1.51851e-05	904	133
0.000722451	5.06171e-06	219	545
0.000722451	0	10518	4561
0.000240817	0.896667	301	181
0.000240817	0.298889	540	538
0.000240817	0.0996296	709	599
0.000240817	0.0332099	295	786
0.000240817	0.01107	858	683
0.000240817	0.00368999	2146	2256
0.000240817	0.00123	5045	2584
0.000240817	0.000409998	2617	2503
0.000240817	0.000136666	3012	2393
0.000240817	4.55554e-05	2436	1821
0.000240817	1.51851e-05	4327	2401
0.000240817	5.06171e-06	1734	4452
0.000240817	0	14078	20361
8.02723e-05	0.896667	8081	6456
8.02723e-05	0.298889	11010	9239
8.02723e-05	0.0996296	13245	17403
8.02723e-05	0.0332099	19908	13050
8.02723e-05	0.01107	23579	18419
8.02723e-05	0.00368999	18092	22704
8.02723e-05	0.00123	35607	22307
8.02723e-05	0.000409998	17619	23907
8.02723e-05	0.000136666	24638	19728
8.02723e-05	4.55554e-05	16900	14080
8.02723e-05	1.51851e-05	10344	10105
8.02723e-05	5.06171e-06	14400	13010
8.02723e-05	0	35763	32294
2.67574e-05	0.896667	18128	10934
2.67574e-05	0.298889	22663	20162
2.67574e-05	0.0996296	26683	20630
2.67574e-05	0.0332099	23912	24564
2.67574e-05	0.01107	20430	19803
2.67574e-05	0.00368999	19039	38117
2.67574e-05	0.00123	54421	49646
2.67574e-05	0.000409998	41336	38790
2.67574e-05	0.000136666	35353	34662
2.67574e-05	4.55554e-05	32736	25714
2.67574e-05	1.51851e-05	23386	24236
2.67574e-05	5.06171e-06	18932	26589
2.67574e-05	0	31747	25592
8.91915e-06	0.896667	17447	10934
8.91915e-06	0.298889	22273	20183
8.91915e-06	0.0996296	29199	23650
8.91915e-06	0.0332099	28137	20849
8.91915e-06	0.01107	30379	28705
8.91915e-06	0.00368999	28016	21522
8.91915e-06	0.00123	63089	40184
8.91915e-06	0.000409998	38047	45923
8.91915e-06	0.000136666	26884	26376
8.91915e-06	4.55554e-05	24361	24041
8.91915e-06	1.51851e-05	15293	17259
8.91915e-06	5.06171e-06	18440	17075
8.91915e-06	0	18615	24455
2.97305e-06	0.896667	13169	10052
2.97305e-06	0.298889	15491	15393
2.97305e-06	0.0996296	25502	20145
2.97305e-06	0.0332099	25298	26112
2.97305e-06	0.01107	25799	22664
2.97305e-06	0.00368999	23132	35934
2.97305e-06	0.00123	73527	41008
2.97305e-06	0.000409998	37456	42043
2.97305e-06	0.000136666	36388	23693
2.97305e-06	4.55554e-05	20410	19971
2.97305e-06	1.51851e-05	27831	17159
2.97305e-06	5.06171e-06	26034	22515
2.97305e-06	0	25773	25667
0	0.896667	14524	10052
0	0.298889	11657	16522
0	0.0996296	16587	17274
0	0.0332099	21788	16447
0	0.01107	20976	18017
0	0.00368999	23090	27670
0	0.00123	40726	37777
0	0.000409998	35726	34683
0	0.000136666	31551	26013
0	4.55554e-05	27365	34300
0	1.51851e-05	28715	32958
0	5.06171e-06	22952	27397
0	0	35860.2	35860.2
